# Supplementary material for: Oxa-azabenzobenzocyclooctynes (O-ABCs): heterobiarylcyclooctynes bearing an endocyclic heteroatom
Source: Royal Society of Chemistry journal article supplement (doi:10.1039/d3ob01559a), 2023-01-01
Supplement: d3ob01559a1.pdf [file d3ob01559a1.pdf]

## Oxa-azabenzobenzocyclooctynes (O-ABCs): Heterobiaryl cyclooctynes bearing an endocyclic heteroatom

Eshani Das,<sup>†,b</sup> Mark Aldren M. Feliciano,<sup>†,a,b</sup> Pavel Yamanushkin,<sup>b</sup> Xinsong Lin,<sup>c</sup>  
Brian Gold<sup>\*,a,b</sup>

<sup>a</sup>Department of Chemistry and Biochemistry, New Mexico State University, Las Cruces, New Mexico, 88003, United States

<sup>b</sup>Department of Chemistry and Chemical Biology, University of New Mexico State, Albuquerque, New Mexico, 87131, United States

<sup>c</sup>Department of Chemistry and Biochemistry, Florida State University, Tallahassee, Florida, 32306, United States

\*Email: bgold@nmsu.edu

| Content                                                                 | Page |
|-------------------------------------------------------------------------|------|
| Table of Contents                                                       | S1   |
| List of Abbreviations                                                   | S2   |
| Experimental Procedures                                                 | S2   |
| Competition Experiment                                                  | S8   |
| Kinetic Analysis                                                        | S9   |
| X-Ray Crystallography Data                                              | S10  |
| Computational Details & Data                                            | S15  |
| NMR spectra                                                             | S18  |
| Cartesian Coordinates, Total Energies, and Imaginary Frequencies (TS's) | S30  |
| References                                                              | S36  |

## List of Abbreviations

|                  |                                               |
|------------------|-----------------------------------------------|
| ABC              | azabenzobenzocyclooctyne                      |
| AIBN             | azobisisobutyronitrile                        |
| CCl <sub>4</sub> | carbon tetrachloride                          |
| CuAAC            | copper-catalyzed azide–alkyne cycloaddition   |
| DIBO             | dibenzocyclooctyne                            |
| DIBAC            | dibenzoazacyclooctyne                         |
| DCM              | dichloromethane                               |
| DMSO             | dimethylsulfoxide                             |
| DIC              | <i>N,N'</i> -diisopropylcarbodiimide          |
| EDC              | 1-ethyl-3-(3-dimethylaminopropyl)carbodiimide |
| EtOAc            | ethyl acetate                                 |
| LiHMDS           | lithium bis(trimethylsilyl)amide              |
| IRC              | intrinsic reaction coordinate                 |
| NBO              | natural bonding orbital                       |
| ODIBO            | oxadibenzocyclooctyne                         |
| O-ABC            | oxa-azabenzobenzocyclooctyne                  |
| SM               | starting material                             |
| SPAAC            | strain-promoted azide–alkyne cycloaddition    |
| THF              | tetrahydrofuran                               |
| TS               | transition state                              |

## Experimental Procedures

**General.** All chemicals were from commercial sources and were used without further purification. NMR spectra were acquired with an Avance 500 spectrometer from Bruker (Billerica, MA, USA). <sup>13</sup>C NMR spectra were registered with broadband decoupling. <sup>1</sup>H NMR chemical shifts were determined relative to the <sup>1</sup>H signals of either CDCl<sub>3</sub> at 7.26 ppm, acetone-*d*<sub>6</sub> at 2.05 ppm, or DMSO-*d*<sub>6</sub> at 2.50 ppm. <sup>13</sup>C NMR chemical shifts were determined relative to the <sup>13</sup>C signals of either CDCl<sub>3</sub> at 77.16 ppm, acetone-*d*<sub>6</sub> at 29.84 or 206.26 ppm, or DMSO-*d*<sub>6</sub> at 39.53 ppm. Mass spectra were acquired by using positive ionization with a G2 XS QToF mass spectrometer from Waters (Milford, MA, USA). Column chromatography was performed on a Selekt automated flash chromatography system from Biotage (Uppsala, Sweden) using prepacked, high capacity normal phase Sfär cartridges. Thin-layer chromatography was performed using TLC Silica gel 60 F<sub>254</sub> Plates from EMD Millipore (Burlington, MA, USA). UV-Vis spectroscopy was performed on a Cary 60 Spectrophotometer from Agilent Technologies (Santa Clara, CA, USA).

The phrase “dry [solvent]” indicates that specified commercial HPLC-grade, inhibitor-free solvents were further purified by degassing and passing consecutively through two columns filled with activated alumina on a solvent purification system from Pure Process Technology (Nashua, NH, USA). Water was purified by dual stage deionization followed by dual stage reverse osmosis.

The phrase “concentrated under reduced pressure” refers to the removal of solvents and other volatile materials using a rotary evaporator at water aspirator pressure (<20 Torr) while maintaining the water-bath temperature below 30 °C. Residual solvent was removed from samples by the vacuum (<0.1 Torr) achieved by a mechanical belt-drive oil pump.

All procedures were performed in air at ambient temperature (~21 °C) and pressure (1.0 atm) unless indicated otherwise.

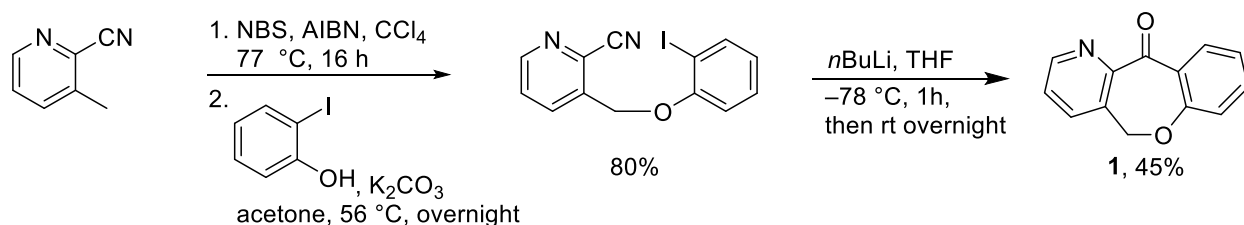

**Scheme S1.** Synthesis of O-ABC precursor ketone **1**.

**3-((2-iodophenoxy)methyl)picolinonitrile.** To a stirred solution of 3-methyl-2-pyridinecarbonitrile (3.0 g, 25.4 mmol, 1.0 equiv.) and *N*-bromosuccinimide (4.97 g, 27.9 mmol, 1.1 equiv) in CCl<sub>4</sub> (80 mL) was added azobisisobutyronitrile (0.42 g, 2.54 mmol, 0.1 equiv.) under irradiation with a tungsten lamp. The reaction mixture was stirred at reflux for 16 h, then cooled to room temperature, filtered and washed with CCl<sub>4</sub>. The filtrate was concentrated under reduced pressure and the crude brominated product was subjected to the next step without further purification. The crude 3-(bromomethyl)-2-pyridinecarbonitrile (4.51 g, 22.9 mmol) and K<sub>2</sub>CO<sub>3</sub> (3.48 g, 25.2 mmol, 1.1 equiv.), and 2-iodophenol (5.04 g, 22.9 mmol, 1 equiv.) were dissolved in anhydrous acetone (100 mL) and refluxed overnight. The resulting mixture was cooled to room temperature and the solvent was removed under reduced pressure. The dry residue was diluted with ethyl acetate, washed with water, dried over Na<sub>2</sub>SO<sub>4</sub>, filtered, concentrated under reduced pressure, then purified by flash chromatography (hexanes:EtOAc, 4:1, *R*<sub>f</sub> = 0.22) to give 3-((2-iodophenoxy)methyl)picolinonitrile as a white solid (6.83 g, 80%); <sup>1</sup>H NMR (500 MHz, CDCl<sub>3</sub>) δ 8.69 (dd, *J* = 4.7, 1.6 Hz, 1H), 8.34 (ddt, *J* = 8.1, 1.8, 0.9 Hz, 1H), 7.82 (dd, *J* = 7.8, 1.6 Hz, 1H), 7.63 (dd, *J* = 8.1, 4.7 Hz, 1H), 7.36 (ddd, *J* = 8.2, 7.4, 1.6 Hz, 1H), 6.96 (dd, *J* = 8.2, 1.3 Hz, 1H), 6.81 (td, *J* = 7.6, 1.3 Hz, 1H), 5.36 (s, 2H). <sup>13</sup>C NMR{<sup>1</sup>H} (125 MHz, CDCl<sub>3</sub>) δ 156.3, 150.3, 139.9, 137.6, 136.3, 131.7, 130.0, 127.3, 124.0, 115.5, 112.9, 86.6, 66.7. HRMS (ESI-TOF) *m/z* calcd. for C<sub>13</sub>H<sub>9</sub>IN<sub>2</sub>NaO [M+Na]<sup>+</sup> 358.9652; found, 358.9664.

**benzo[6,7]oxepino[4,3-*b*]pyridin-11(5*H*)-one (**1**)** was prepared via a modified Parham cyclization approach previously reported to synthesize ketone **2**.<sup>S1</sup>

A stirred solution of 3-((2-iodophenoxy)methyl)picolinonitrile (3.0 g, 8.9 mmol, 1.0 equiv.) in dry THF (300 mL) was cooled under Ar(g) to -78 °C (dry ice/acetone bath), then *n*-butyllithium (2.5 M in Hexanes, 10.7 mmol, 4.3 mL, 1.2 equiv.) was added dropwise via syringe pump at a rate 24 mL/h. The reaction mixture was kept at -78 °C for 1 h, and then allowed to slowly warm to room temperature while stirring overnight. The reaction mixture was quenched using 5% HCl and stirred for an hour. The free base was obtained by adding sufficient 10% NaOH solution to turn the solution basic, and stirring for an additional hour, which was extracted with EtOAc. The solvent was then removed under reduced pressure and the dry residue was purified flash chromatography (hexanes:EtOAc 1:1, *R*<sub>f</sub> = 0.22) to provide compound **1** as gummy white solid (0.855 g, 45% yield). <sup>1</sup>H NMR (500 MHz, CDCl<sub>3</sub>) δ 8.79 (dd, *J* = 4.8, 1.6 Hz, 1H), 8.24 (dd, *J* = 8.1, 1.8 Hz, 1H), 7.78 (dd, *J* = 7.7, 1.6 Hz, 1H), 7.53 – 7.47 (m, 2H), 7.14 (ddd, *J* = 8.1, 7.0, 1.2 Hz, 1H), 7.06 (dd, *J* = 8.3, 1.2 Hz, 1H), 5.20 (s, 2H). <sup>13</sup>C NMR{<sup>1</sup>H} (125 MHz, CDCl<sub>3</sub>) δ 190.4, 160.9, 156.5, 151.0, 136.3, 135.9, 132.4, 131.3, 126.5, 124.8, 122.5, 120.6, 71.5. HRMS (ESI-TOF) *m/z* calcd. for C<sub>13</sub>H<sub>10</sub>NO<sub>2</sub> [M+H]<sup>+</sup> 212.0706; found, 212.0695.

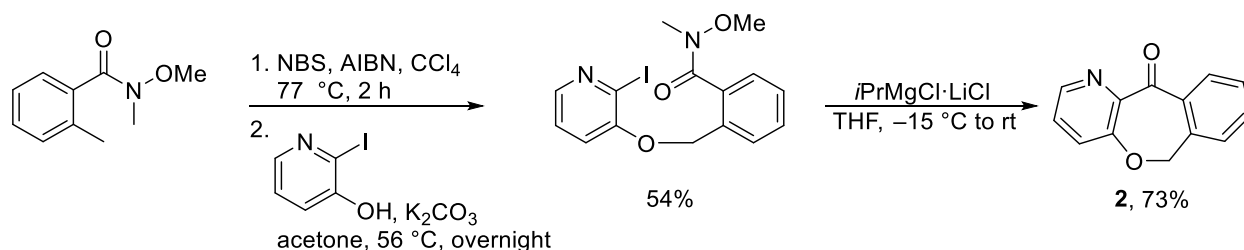

**Scheme S2.** Synthesis of O-ABC-II precursor ketone **2**.

***N*-Methoxy-*N*,2-dimethylbenzamide** was prepared according to previously reported procedures.<sup>S2</sup> Characterization data matched the desired compound.

**2-(((2-iodopyridin-3-yl)oxy)-*N*-methoxy-*N*-methylbenzamide.** To a stirred solution of *N*-methoxy-*N*,2-dimethylbenzamide (1.0 g, 5.6 mmol, 1.0 equiv.) and *N*-bromosuccinimide (1.19 g, 6.7 mmol, 1.2 equiv.) in CCl<sub>4</sub> (25 mL) was added azobisisobutyronitrile (0.09 g, 0.6 mmol, 0.1 equiv.) under irradiation with a tungsten lamp. The reaction mixture was stirred at reflux for 2 h, then cooled to room temperature, filtered and washed with CCl<sub>4</sub>. The filtrate was concentrated under reduced pressure and the crude brominated product was subjected to next step without further purification. The crude 2-(bromomethyl)-*N*-methoxy-*N*-methylbenzamide (0.91 g, 3.5 mmol, 1.0 equiv.), 2-iodopyridin-3-ol (1.56 g, 7.1 mmol, 2.0 equiv.), and K<sub>2</sub>CO<sub>3</sub> (1.46 g, 10.6 mmol, 3.0 equiv.) were dissolved in anhydrous acetone (20 mL) and refluxed overnight. The resulting mixture was cooled to room temperature and the solvent was removed under reduced pressure. The dry residue was diluted with ethyl acetate, washed with water, dried over Na<sub>2</sub>SO<sub>4</sub>, filtered, concentrated under reduced pressure, then purified by flash chromatography (EtOAc:hexanes 1:1, *R*<sub>f</sub> = 0.27) to give 2-(((2-iodopyridin-3-yl)oxy)methyl)-*N*-methoxy-*N*-methylbenzamide as a colorless gummy solid (1.20 g, 54%). <sup>1</sup>H NMR (500 MHz, CDCl<sub>3</sub>): δ 8.00 (dd, *J* = 4.5, 1.6 Hz, 1H), 7.70 – 7.68 (m, 1H), 7.50 – 7.46 (m, 1H), 7.43 – 7.37 (m, 2H), 7.17 – 7.09 (m, 2H), 5.25 (s, 2H), 3.53 (s, 3H), 3.35 (s, 3H). <sup>13</sup>C NMR{<sup>1</sup>H} (125 MHz, CDCl<sub>3</sub>) δ 169.4, 154.4, 143.1, 133.6, 133.4, 130.2, 128.3, 128.0, 127.3, 123.7, 118.9, 112.1, 68.6, 61.5, 33.8. HRMS (ESI-TOF) *m/z* calcd. for C<sub>15</sub>H<sub>16</sub>N<sub>2</sub>O<sub>3</sub> [M+H]<sup>+</sup> 399.0200; found, 399.0181.

**benzo[5,6]oxepino[3,2-*b*]pyridin-11(6*H*)-one (**2**).**<sup>S1</sup> To a stirred solution of 2-(((2-iodopyridin-3-yl)oxy)methyl)-*N*-methoxy-*N*-methylbenzamide (0.390 g, 0.98 mmol, 1.0 equiv.) in dry THF (20 mL), was added *i*PrMgCl·LiCl (1.3 M in THF, 1.07 mmol, 0.83 mL, 1.1 equiv.) dropwise at –15 °C. The resulting mixture was slowly allowed to warm to room temperature and was stirred for another hour. The reaction mixture was quenched with aqueous NH<sub>4</sub>Cl, extracted with EtOAc, washed with water, dried over Na<sub>2</sub>SO<sub>4</sub>, filtered, concentrated under reduced pressure, and subjected to flash column chromatography (hexanes:EtOAc 1:1, *R*<sub>f</sub> = 0.13) to provide compound **2** as light brown gummy solid (0.150 g, 73%). <sup>1</sup>H NMR (500 MHz, CDCl<sub>3</sub>) δ 8.66 – 8.64 (m, 1H), 7.98 (dd, *J* = 7.5, 1.5 Hz, 1H), 7.63 – 7.59 (m, 1H), 7.56 – 7.48 (m, 3H), 7.40 (dd, *J* = 7.5, 1.5 Hz, 1H), 5.28 (s, 2H). <sup>13</sup>C NMR{<sup>1</sup>H} (125 MHz, CDCl<sub>3</sub>) δ 189.6, 159.1, 144.3, 140.1, 139.4, 134.8, 133.4, 130.9, 130.3, 129.9, 128.9, 128.2, 74.0. HRMS (ESI-TOF) *m/z* calcd. for C<sub>13</sub>H<sub>10</sub>NO<sub>2</sub> [M+H]<sup>+</sup> 212.0706; found, 212.0701.

**4-((*N*-Tetrazolyl)methyl)morpholine** was prepared according to previously reported procedures.<sup>S3</sup> Characterization data matched the desired compound.

**2-Azabenzobenzo-8-chlorobenzocyclooctyne (ABC)** was prepared according to previously reported procedures.<sup>S3</sup> Characterization data matched the desired compound.

**11-(1H-tetrazol-5-yl)-6,11-dihydrodibenzo[*b,e*]oxepin-11-ol** was prepared en route to **ODIBO** (unsubstituted) to test the compatibility of the previously reported carbene-mediated ring expansion approach<sup>S3,S4</sup> with systems bearing endocyclic oxygen atoms.

A stirred solution of 4-((*N*-tetrazolyl)methyl)morpholine (0.644 g, 3.80 mmol, 2.0 equiv.) and dibenzo[*b,e*]oxepin-11(6*H*)-one (0.400 g, 1.90 mmol, 1.0 equiv.) in dry THF (15 mL) was cooled under Ar(g) to  $-78\text{ }^{\circ}\text{C}$  (dry ice/acetone bath), then LiHMDS (1.0 M in THF, 4.0 mmol, 4.0 mL, 2.1 equiv.) was added dropwise. The reaction mixture was kept at  $-78\text{ }^{\circ}\text{C}$  for 2 h, and then allowed to slowly warm to room temperature while stirring overnight. The reaction mixture was concentrated under reduced pressure, and the remaining residue was treated with aqueous HCl (1.0 M, 25 mL) and stirred at room temperature for 1 h. The solution was then extracted with EtOAc and the combined organic extracts were dried over Na<sub>2</sub>SO<sub>4</sub>, filtered, and concentrated under reduced pressure. The dry residue was subjected to flash column chromatography (hexanes:EtOAc 1:1,  $R_f = 0.14$ ) to provide title compound as white gummy solid (0.426 g, 80%). **<sup>1</sup>H NMR** (500 MHz, Acetone)  $\delta$  8.11 (dd,  $J = 7.8, 1.5$  Hz, 1H), 7.92 (dd,  $J = 7.9, 1.7$  Hz, 1H), 7.39 – 7.29 (m, 3H), 7.17 – 7.14 (m, 2H), 7.01 (dd,  $J = 8.0, 1.3$  Hz, 1H), 5.46 (d,  $J = 14.8$  Hz, 1H), 4.97 (d,  $J = 14.8$  Hz, 1H). **<sup>13</sup>C NMR{<sup>1</sup>H}** (125 MHz, Acetone)  $\delta$  162.7, 156.0, 141.1, 137.0, 135.9, 130.7, 129.3, 128.2, 128.0, 127.1, 126.0, 124.2, 122.1, 73.3, 72.3. **HRMS** (ESI-TOF)  $m/z$  calcd. for C<sub>15</sub>H<sub>11</sub>N<sub>4</sub>O<sub>2</sub> [M-H]<sup>-</sup> 279.0887; found, 279.0887.

**ODIBO**. A stirred solution of 11-(1H-tetrazol-5-yl)-6,11-dihydrodibenzo[*b,e*]oxepin-11-ol (0.360 g, 1.28 mmol, 1.0 equiv.) in dry THF (30 mL) was treated with EDC (0.270 g, 1.41 mmol, 1.1 equiv.) and allowed to react overnight. The reaction mixture was concentrated under reduced pressure, and the residue was purified by flash chromatography (hexanes:EtOAc 9.7:0.3,  $R_f = 0.2$ ) to provide ODIBO as yellow gummy solid (0.243 g, 90%). **<sup>1</sup>H NMR** (500 MHz, CDCl<sub>3</sub>)  $\delta$  7.43 – 7.36 (m, 2H), 7.32 – 7.23 (m, 4H), 7.20 – 7.18 (m, 1H), 7.11 – 7.08 (m, 1H), 5.28 (d,  $J = 12.0$  Hz, 1H), 4.55 (d,  $J = 12.0$  Hz, 1H). **<sup>13</sup>C NMR{<sup>1</sup>H}** (125 MHz, CDCl<sub>3</sub>)  $\delta$  169.9, 147.2, 130.3, 129.4, 129.1, 128.0, 127.1, 126.4, 125.9, 124.0, 122.2, 118.0, 114.3, 111.7, 78.0. **HRMS** (ESI-TOF)  $m/z$  calcd. for C<sub>15</sub>H<sub>11</sub>O [M+H]<sup>+</sup> 207.0804; found, 207.0806.

**11-(1H-tetrazol-5-yl)-5,11-dihydrobenzo[6,7]oxepino[4,3-*b*]pyridin-11-ol (1')**. A stirred solution of 4-((*N*-tetrazolyl)methyl)morpholine (0.530 g, 3.13 mmol, 2.0 equiv.) and benzo[6,7]oxepino[4,3-*b*]pyridin-11(5*H*)-one **1** (0.330 g, 1.56 mmol, 1.0 equiv.) in dry THF (10 mL), was cooled under Ar(g) to  $-78\text{ }^{\circ}\text{C}$  (dry ice/acetone bath), then LiHMDS (1.0 M in THF, 3.3 mmol, 3.3 mL, 2.1 equiv.) was added dropwise. The reaction mixture was kept at  $-78\text{ }^{\circ}\text{C}$  for 2 h, and then allowed to slowly warm to room temperature while stirring overnight. The reaction mixture was concentrated under reduced pressure, and the remaining residue was treated with aqueous HCl (1.0 M, 20 mL) and stirred at room temperature for 1 h. The solution was then extracted with EtOAc and the combined organic extracts were dried over Na<sub>2</sub>SO<sub>4</sub>, filtered, and concentrated under reduced pressure. The dry residue was subjected to flash column chromatography (DCM:MeOH 9:1,  $R_f = 0.15$ ) to provide compound **1'** as light brown gummy solid (0.297 g, 1.06 mmol, 67%). **<sup>1</sup>H NMR** (500 MHz, Acetone)  $\delta$  8.57 – 8.55 (m, 1H), 7.96 (dd,  $J = 7.8, 1.7$  Hz, 1H), 7.76 – 7.73 (m, 1H), 7.55 – 7.53 (m, 2H), 7.40 (td,  $J = 7.7, 1.7$  Hz, 1H), 7.25 (td,  $J = 7.6, 1.2$  Hz, 1H), 7.10 (dd,  $J = 8.0, 1.2$  Hz, 1H), 5.49 (d,  $J = 15.8$  Hz, 1H), 5.07 (d,  $J = 15.8$  Hz, 1H); **<sup>13</sup>C NMR{<sup>1</sup>H}** (125 MHz, Acetone)  $\delta$  162.2, 156.1, 153.8, 146.2, 137.4, 136.9, 133.1, 131.4, 126.8, 125.5, 125.3, 122.6, 72.1, 71.3; **HRMS** (ESI-TOF)  $m/z$  calcd. for C<sub>14</sub>H<sub>10</sub>N<sub>5</sub>O<sub>2</sub> [M-H]<sup>-</sup> 280.0840; found, 280.0844.

**11-(1H-tetrazol-5-yl)-6,11-dihydrobenzo[5,6]oxepino[3,2-*b*]pyridin-11-ol (2')**. A stirred solution of 4-((*N*-tetrazolyl)methyl)morpholine (0.160 g, 0.95 mmol, 2.0 equiv.) and benzo[5,6]oxepino[3,2-*b*]pyridin-11(6*H*)-one **2** (0.100 g, 0.47 mmol, 1.0 equiv.) in dry THF (5 mL), was cooled under Ar(g) to  $-78\text{ }^{\circ}\text{C}$  (dry ice/acetone bath), then LiHMDS (1.0 M in THF, 1.0 mmol, 1.0 mL, 2.1 equiv.) was added dropwise. The reaction mixture was kept at  $-78\text{ }^{\circ}\text{C}$  for 2 h, and then allowed to slowly

warm to room temperature while stirring overnight. The reaction mixture was concentrated under reduced pressure, and the remaining residue was treated with aqueous HCl (1.0 M, 10 mL) and stirred at room temperature for 1 h. The solution was then extracted with EtOAc and the combined organic extracts were dried over Na<sub>2</sub>SO<sub>4</sub>, filtered, and concentrated under reduced pressure. The dry residue was subjected to flash column chromatography (DCM:MeOH 9:1, *R<sub>f</sub>* = 0.15) to provide compound **2'** as light brown gummy solid (0.085 g, 64%). <sup>1</sup>H NMR (500 MHz, CDCl<sub>3</sub>) δ 9.57 (brs, 2H), 8.15 – 8.07 (m, 2H), 7.36 – 7.20 (m, 5H), 5.67 (d, *J* = 13.7 Hz, 1H), 4.80 (d, *J* = 13.7 Hz, 1H). <sup>13</sup>C NMR{<sup>1</sup>H} (125 MHz, CDCl<sub>3</sub>) δ 162.4, 153.8, 141.6, 139.9, 139.4, 133.1, 131.1, 129.8, 129.8, 129.7, 126.4, 125.8, 72.3, 71.3. HRMS (ESI-TOF) *m/z* calcd. for C<sub>14</sub>H<sub>12</sub>N<sub>5</sub>O<sub>2</sub> [M+H]<sup>+</sup> 282.0986; found, 282.0972.

**6-oxa-2-azabenzobenzocyclooctyne (O-ABC).** A stirred solution of **1'** (0.025 g, 0.089 mmol, 1.0 equiv.) in DCM (25 mL) under Ar(g) was treated with DIC (0.0151 mL, 0.098 mmol, 1.1 equiv.). The resulting solution was stirred at room temperature for 16 h, protected from light. After completion of reaction, as monitored by TLC, silica gel was added and solvent was removed under reduced pressure. The silica-bound residue was immediately subjected to flash chromatography. DMSO-*d*<sub>6</sub> (0.6 mL) was added to the combined fractions containing O-ABC (~25 mL). The mobile phase (hexanes:EtOAc 4:1, *R<sub>f</sub>* = 0.20) was then removed under reduced pressure while protecting the compound from light. The flask was charged with Ar(g) before removing the residual mobile phase under high vacuum for 30 mins, affording a pure solution of O-ABC. 1,3,5-Trimethoxybenzene (0.1 mL, 10 mg/mL) was added as an internal standard to 0.4 mL of O-ABC solution and relative proton intensities enabled determination of the yield (6%). <sup>1</sup>H NMR (500 MHz, DMSO) δ 8.59 (dd, *J* = 5.0, 1.7 Hz, 1H), 7.97 (dd, *J* = 7.6, 1.7 Hz, 1H), 7.46 – 7.39 (m, 3H), 7.28 (dd, *J* = 8.2, 1.2 Hz, 1H), 7.23 (td, *J* = 7.5, 1.2 Hz, 1H), 5.42 (d, *J* = 12.5 Hz, 1H), 4.50 (d, *J* = 12.5 Hz, 1H). <sup>13</sup>C NMR{<sup>1</sup>H} (125 MHz, DMSO) δ 169.9, 149.8, 146.1, 143.2, 137.8, 130.4, 127.2, 124.3, 122.6, 122.2, 115.8, 115.0, 111.4, 76.0. HRMS (ESI-TOF) *m/z* calcd. for C<sub>14</sub>H<sub>10</sub>N<sub>5</sub>O<sub>2</sub> [M+H]<sup>+</sup> 208.0757; found, 208.0757.

### 3-benzyl-3,8-dihydrobenzo[7,8][1,2,3]triazolo[4',5':5,6]oxocino[4,3-*b*]pyridine (**3**).

**Procedure A.** A stirred solution of **1'** (0.015 g, 0.053 mmol, 1 equiv.) in DCM (10 mL) under Ar(g) was treated with DIC (0.009 mL, 0.059 mmol, 1.1 equiv.), followed by benzyl azide (0.021 g, 0.16 mmol, 3 equiv.). The resulting solution was stirred at room temperature for 16 h, protected from light. The reaction mixture was concentrated under reduced pressure and was subjected to flash chromatography (EtOAc:hexanes 4:1, *R<sub>f</sub>* = 0.32) to afford the cycloadduct as an amorphous white solid (0.005 g, 30%).

**Procedure B.** Immediately following isolation of O-ABC via flash column chromatography, a solution was prepared in DMSO-*d*<sub>6</sub> as described above, and 1,3,5-trimethoxybenzene was added as an internal standard (0.001 g, 0.0059 mmol) in order to determine the concentration. To this solution of O-ABC (6.4 μM, 0.5 mL, 0.0032 mmol, 1 equiv.) was added benzyl azide (0.00047 g, 0.0035 mmol, 1.1 equiv.). Within minutes, the alkyne had quantitatively formed the triazole product, as determined by <sup>1</sup>H NMR.

Crystals for X-ray diffraction were obtained by dissolving ~5 mg of the obtained solid in DCM, followed by 3–4 drops of HPLC-grade hexanes. <sup>1</sup>H NMR (500 MHz, CDCl<sub>3</sub>) δ 8.73 (dd, *J* = 4.8, 1.7 Hz, 1H), 7.83 (dd, *J* = 7.9, 1.8 Hz, 1H), 7.70 (dd, *J* = 7.8, 1.7 Hz, 1H), 7.30 (dd, *J* = 7.8, 4.8 Hz, 1H), 7.20 (ddd, *J* = 8.7, 7.2, 1.8 Hz, 1H), 7.18 – 7.13 (m, 3H), 7.06 – 7.00 (m, 3H), 6.94 (dd, *J* = 8.3, 1.3 Hz, 1H), 5.93 (s, 2H), 5.05 (s, 2H); <sup>13</sup>C NMR{<sup>1</sup>H} (125 MHz, CDCl<sub>3</sub>) δ 154.6, 150.0, 147.9, 145.5, 138.5, 135.8, 133.4, 133.0, 130.7, 129.9, 128.6, 128.1, 127.7, 124.0, 122.4, 120.5, 117.9, 69.3, 52.9; HRMS (ESI-TOF) *m/z* calcd. for C<sub>21</sub>H<sub>17</sub>N<sub>4</sub>O [M+H]<sup>+</sup> 341.1397; found, 341.1392.

**3-benzyl-3,9-dihydrobenzo[6,7][1,2,3]triazolo[4',5':4,5]oxocino[3,2-*b*]pyridine (**4**).** To a stirred solution of 11-(1*H*-tetrazol-5-yl)-6,11-dihydrobenzo[5,6]oxepino[3,2-*b*]pyridin-11-ol **3'** (0.026 g,

0.09 mmol, 1.0 equiv.) in dry THF (30 mL) was added EDC (0.020 g, 0.10 mmol, 1.1 equiv.), followed by benzyl azide (0.037 g, 0.28 mmol, 3.0 equiv.). The resulting mixture was allowed to stir at room temperature overnight. The reaction mixture was concentrated under reduced pressure and was subjected to flash chromatography (hexanes:EtOAc, 4:1,  $R_f = 0.16$ ) to provide the cycloadduct as an amorphous white solid (0.017 g, 53%). Crystals for X-ray diffraction were obtained by dissolving ~5 mg of the obtained solid in DCM, followed by 3–4 drops of HPLC-grade hexanes.  $^1\text{H NMR}$  (500 MHz,  $\text{CDCl}_3$ )  $\delta$  8.31 (dd,  $J = 4.5, 1.5$  Hz, 1H), 7.81 (dd,  $J = 7.5, 1.5$  Hz, 1H), 7.51 – 7.44 (m, 2H), 7.41 – 7.38 (m, 1H), 7.24 – 7.21 (m, 4H), 7.14 – 7.08 (m, 3H), 5.97 (s, 2H), 5.10 (s, 2H).  $^{13}\text{C NMR}\{^1\text{H}\}$  (125 MHz,  $\text{CDCl}_3$ )  $\delta$  153.3, 144.2, 142.5, 136.0, 134.0, 132.9, 132.4, 132.2, 130.6, 129.9, 129.6, 129.5, 129.2, 128.7, 128.2, 127.8, 124.9, 70.7, 53.4. **HRMS** (ESI-TOF)  $m/z$  calcd. for  $\text{C}_{21}\text{H}_{17}\text{N}_4\text{O}$   $[\text{M}+\text{H}]^+$  341.1397; found, 341.1379.

**3-benzyl-11-chloro-8,9-dihydro-3H-benzo[5,6][1,2,3]triazolo[4',5':7,8]cycloocta[1,2-b]pyridine (5).** To a solution of ABC (0.015 g, 0.063 mmol, 1.0 equiv.) in 1 mL  $\text{CH}_3\text{CN}$  was added benzyl azide (0.0092 g, 0.069 mmol, 1.1 equiv.). Upon completion of the reaction, the solvent was removed under reduced pressure and the dry residue was purified by flash chromatography (hexanes:EtOAc 1:1,  $R_f = 0.76$ ), affording the pure cycloadduct as an amorphous white solid (0.0198 g, 85%). Crystals for X-ray diffraction were obtained by dissolving ~5 mg of the obtained solid in DCM, followed by 3–4 drops of HPLC-grade hexanes.  $^1\text{H NMR}$  (500 MHz,  $\text{CDCl}_3$ )  $\delta$  8.54 (d,  $J = 4.7$  Hz, 1H), 7.49 (dd,  $J = 13.6, 8.1$  Hz, 2H), 7.21 – 7.12 (m, 6H), 7.01 – 6.95 (m, 2H), 5.84 (s, 2H), 3.02 (t,  $J = 6.9$  Hz, 2H), 2.82 (t,  $J = 7.0$  Hz, 2H).  $^{13}\text{C NMR}\{^1\text{H}\}$  (126 MHz,  $\text{CDCl}_3$ )  $\delta$  147.7, 145.7, 145.7, 139.9, 138.8, 136.4, 135.7, 134.2, 133.3, 132.7, 130.0, 128.8, 128.6, 128.1, 127.7, 126.8, 123.8, 52.8, 34.2, 33.3. **HRMS** (ESI-TOF)  $m/z$  calcd. for  $\text{C}_{22}\text{H}_{17}\text{N}_4\text{Cl}$   $[\text{M}+\text{H}]^+$  373.1214; found, 373.1207.

## Competition Experiment

Immediately following isolation of O-ABC via flash column chromatography, a solution was prepared in DMSO- $d_6$  as described above. To a 400  $\mu\text{L}$  of O-ABC solution, 1,3,5-trimethoxybenzene (100  $\mu\text{L}$ , 1 mg/mL) was added as an internal standard in order to determine the concentration. To this solution of O-ABC (determined to be 4.4 mM, 0.5 mL, 2.2  $\mu\text{mol}$ , 1.0 equiv.), 524  $\mu\text{L}$  of ABC (2.2  $\mu\text{mol}$ , 1.0 equiv.) was added from a stock solution (4.2 mM) in DMSO- $d_6$  and the ratio was determined to be 1:1 by  $^1\text{H}$  NMR. 103  $\mu\text{L}$  of benzyl azide was added from a stock solution (15 mM) in DMSO- $d_6$  and the reaction mixture was allowed to run to completion. Analysis by  $^1\text{H}$  NMR (Figure S1) indicated complete consumption of benzyl azide and an 8.4:1 ratio of cycloadducts **3** : **5** (integration values of 1.94 : 0.23, relative to 1,3,5-trimethoxybenzene).

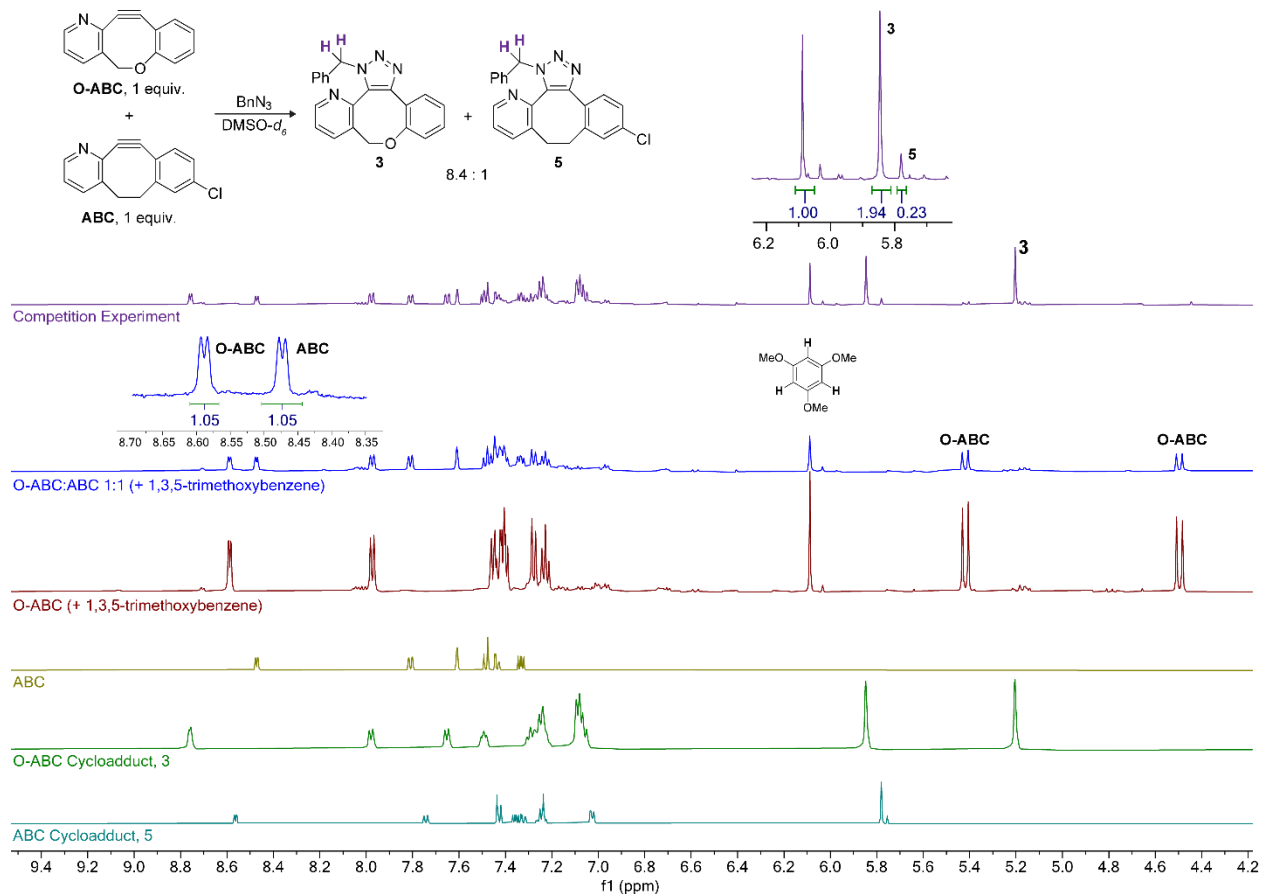

**Figure S1.** The rate of the SPAAC between O-ABC and benzyl azide was estimated in a competition experiment against ABC in DMSO- $d_6$ . Experimental details are described above. The top three spectra correspond to the competition experiment (inset: integration of cycloadducts relative to trimethoxybenzene), determination of O-ABC:ABC ratio prior to addition of benzyl azide (inset: integration values 1.05:1.05, relative to 1,3,5-trimethoxybenzene), and O-ABC with 1,3,5-trimethoxybenzene (internal standard). The bottom three spectra are provided for reference.



## Kinetic Analysis

The rate constant of the reaction between ABC and benzyl azide was determined by UV-Vis spectroscopy by following the decay of the characteristic 320 nm absorbance of ABC. The cycloaddition reaction was performed in DMSO at 25 °C under pseudo-first order conditions, using 10-fold excess of azide. Stock solutions of ABC (0.04 mM in DMSO) and benzyl azide (1.6 mM in DMSO) were prepared and mixed in a 1.0 mL cuvette (0.5 mL each), which was inverted three times and inserted into the spectrophotometer. The initial concentrations at the outset of the reaction were 0.04 mM and 0.4 mM for ABC and benzyl azide, respectively. A spectrum was acquired every 10 seconds for 1200 seconds. Reaction velocity was determined from the inverse of the slope of a semilog plot of absorbance as a function of time and the slope was used to calculate a pseudo-first-order rate constant ( $k'$ ) for the reaction (Figure S3), which was converted to a second-order rate constant ( $k = k'/[\text{BnN}_3]$ ) as the mean  $\pm$  SD from triplicate measurements.

The rate constant for the cycloaddition reaction between ABC and benzyl azide in DMSO was found to be  $k = 0.6 \pm 0.003 \text{ M}^{-1}\text{s}^{-1}$ .

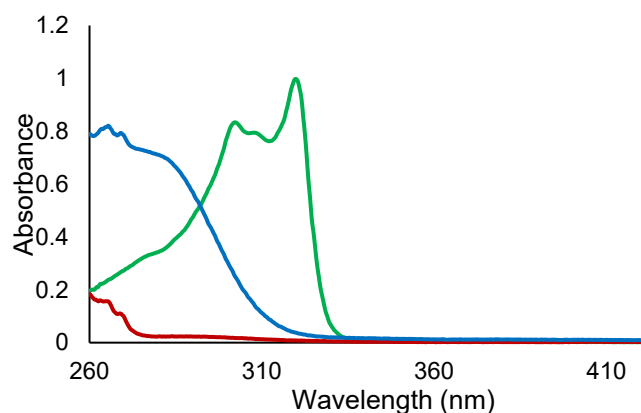

**Figure S2.** Ultraviolet spectra of ABC (green), benzyl azide (red), and cycloadduct 5 (blue) in DMSO at 1.6 mM.

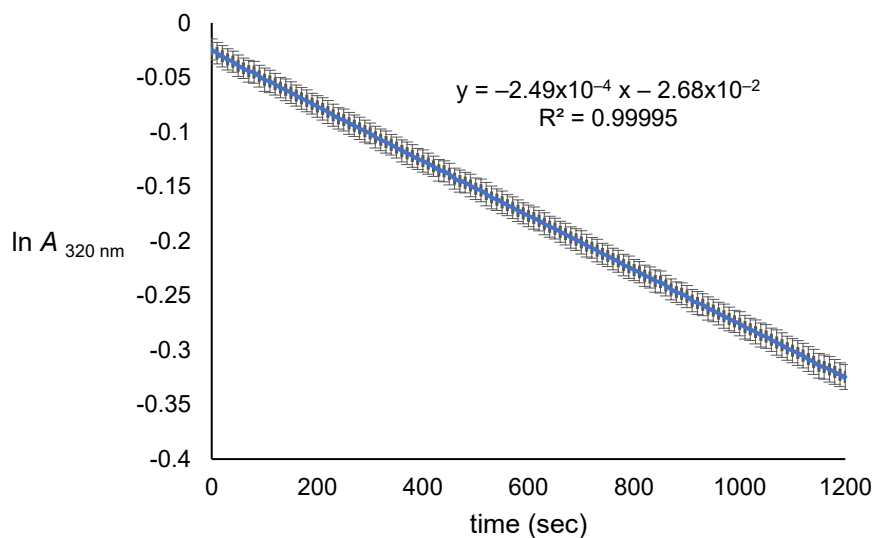

**Figure S3.** Kinetic plot of the reaction in triplicate of ABC with  $\text{BnN}_3$ . Data were fitted by linear regression.

## X-Ray Crystallography

Crystals for X-ray diffraction were obtained by dissolving ~5 mg of 3, 4, or 5 in DCM, followed by 3–4 drops of HPLC-grade hexanes. Details regarding diffraction data collection and each structure are provided below. This work made use of the Rigaku Synergy-S single-crystal X-ray diffractometer, which was acquired through the NSF MRI program (CHE-1828362).

Crystallographic data for the structures reported in this paper have been deposited with the Cambridge Crystallographic Data Centre.<sup>S5</sup> CCDC 2259714, 2286852, and 2286853 contain the supplementary crystallographic data for this paper. These data can be obtained free of charge from The Cambridge Crystallographic Data Centre.

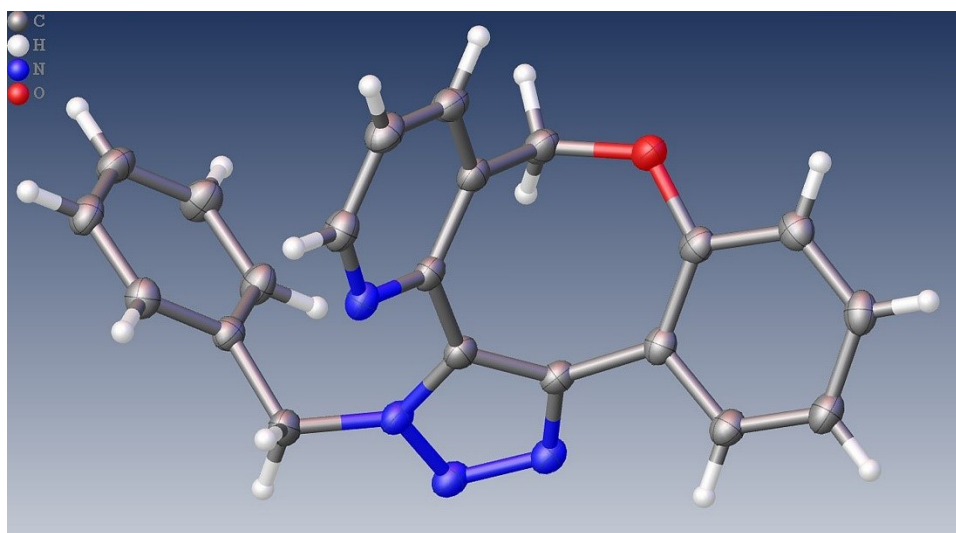

**Figure S4.** ORTEP diagram of **3** (O-ABC-BnN<sub>3</sub> cycloadduct) with 50% probability ellipsoids.

**Data collection.** A clear whiteish colourless, irregular shaped crystal was mounted on a nylon loop with perfluoroether oil. The sample was crystallized by a slow evaporation method. Data were collected from a shock-cooled single crystal at 99.9(6) K on a XtaLAB Synergy, Dualflex, HyPix four-circle diffractometer with a micro-focus sealed X-ray tube using a mirror as monochromator and a HyPix detector. The diffractometer was equipped with an Oxford Cryostream 800 low temperature device and used Cu  $K_{\alpha}$  radiation ( $\lambda = 1.54184 \text{ \AA}$ ). All data were integrated with CrysAlispro and a gaussian absorption correction using SCALE3 ABSPACK was applied.<sup>S6</sup> The structure was solved by dual methods using SHELXT and refined by full-matrix least-squares methods against  $F^2$  by SHELXL.<sup>S7</sup> All non-hydrogen atoms were refined with anisotropic displacement parameters. All hydrogen atoms were refined isotropic on calculated positions using a riding model with their  $U_{\text{iso}}$  values constrained to 1.5 times the  $U_{\text{eq}}$  of their pivot atoms for terminal  $\text{sp}^3$  carbon atoms and 1.2 times for all other carbon atoms.

**Table S1.** Crystal data and structure refinement for **3** (O-ABC cycloadduct).

|                                                 |                                                                                |
|-------------------------------------------------|--------------------------------------------------------------------------------|
| CCDC number                                     | 2259714                                                                        |
| Empirical formula                               | C <sub>21</sub> H <sub>16</sub> N <sub>4</sub> O                               |
| Formula weight                                  | 340.38                                                                         |
| Temperature [K]                                 | 99.9(6)                                                                        |
| Crystal system                                  | triclinic                                                                      |
| Space group (number)                            | $P\bar{1}$ (2)                                                                 |
| <i>a</i> [Å]                                    | 7.8488(2)                                                                      |
| <i>b</i> [Å]                                    | 9.8954(3)                                                                      |
| <i>c</i> [Å]                                    | 12.1031(4)                                                                     |
| $\alpha$ [°]                                    | 68.423(3)                                                                      |
| $\beta$ [°]                                     | 74.665(3)                                                                      |
| $\gamma$ [°]                                    | 77.346(3)                                                                      |
| Volume [Å <sup>3</sup> ]                        | 835.21(5)                                                                      |
| <i>Z</i>                                        | 2                                                                              |
| $\rho_{\text{calc}}$ [gcm <sup>-3</sup> ]       | 1.353                                                                          |
| $\mu$ [mm <sup>-1</sup> ]                       | 0.693                                                                          |
| <i>F</i> (000)                                  | 356                                                                            |
| Crystal size [mm <sup>3</sup> ]                 | 0.195×0.098×0.018                                                              |
| Crystal colour                                  | clear whiteish colourless                                                      |
| Crystal shape                                   | irregular                                                                      |
| Radiation                                       | Cu <i>K</i> <sub>α</sub> ( $\lambda=1.54184$ Å)                                |
| 2 $\theta$ range [°]                            | 8.02 to 154.82 (0.79 Å)                                                        |
| Index ranges                                    | -9 ≤ <i>h</i> ≤ 9<br>-12 ≤ <i>k</i> ≤ 12<br>-15 ≤ <i>l</i> ≤ 15                |
| Reflections collected                           | 38664                                                                          |
| Independent reflections                         | 3490<br><i>R</i> <sub>int</sub> = 0.0525<br><i>R</i> <sub>sigma</sub> = 0.0180 |
| Completeness to<br>$\theta = 67.684^\circ$      | 99.9 %                                                                         |
| Data / Restraints /<br>Parameters               | 3490/0/236                                                                     |
| Goodness-of-fit on <i>F</i> <sup>2</sup>        | 1.067                                                                          |
| Final <i>R</i> indexes<br>[ $\geq 2\sigma(I)$ ] | <i>R</i> <sub>1</sub> = 0.0368<br><i>wR</i> <sub>2</sub> = 0.0961              |
| Final <i>R</i> indexes<br>[all data]            | <i>R</i> <sub>1</sub> = 0.0395<br><i>wR</i> <sub>2</sub> = 0.0980              |
| Largest peak/hole [eÅ <sup>-3</sup> ]           | 0.22/-0.20                                                                     |
| Extinction coefficient                          | 0.0044(7)                                                                      |

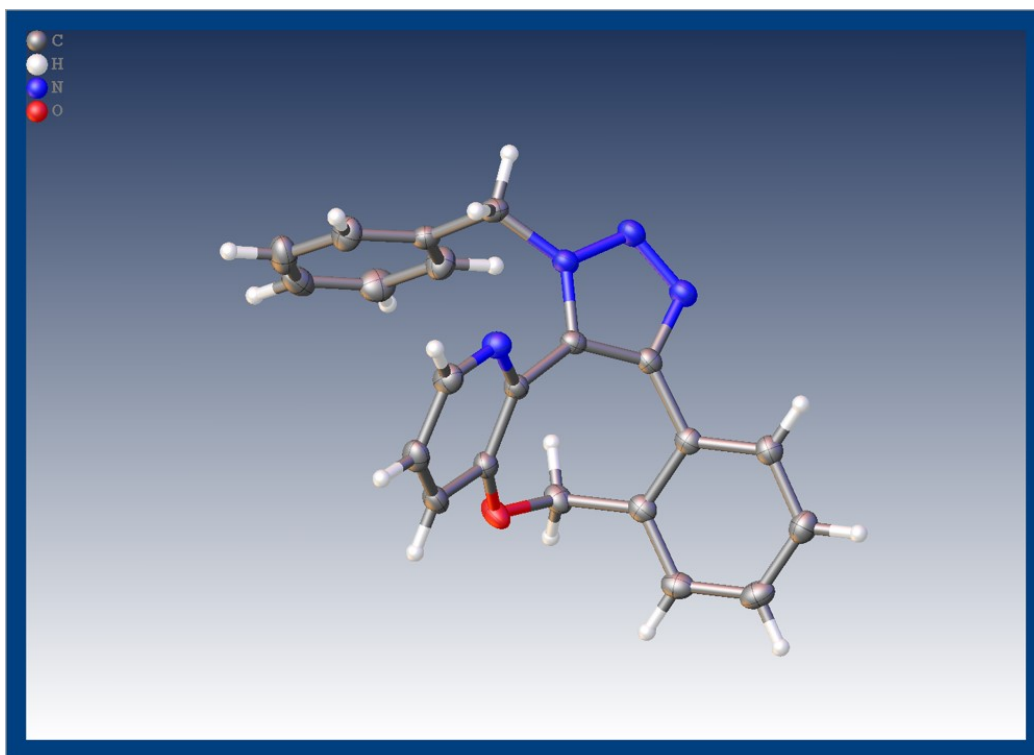

**Figure S5:** ORTEP diagram of **4** (O-ABC-II-BnN<sub>3</sub> cycloadduct) with 50% probability ellipsoids.

**Data collection.** A single clear irregular-shaped crystal of approximate dimension  $0.303 \times 0.284 \times 0.160$  mm<sup>3</sup> was adhered to a Mitegen loop with Paratone oil. Crystallographic data were collected at temperature 150 K on a Rigaku-Oxford Diffraction XtaLAB-Synergy-S diffractometer with a Hypix-6000HE (Hybrid Photon Counting) detector, using Cu-K $\alpha$  radiation of wavelength 1.54187 Å. The intensity data were measured by a  $\omega$ -scan with 0.5° oscillations for each frame with the intensity that is more than 10:1 for data-to-parameter ratio. The program suite CrysAlis<sup>Pro</sup> was used for data collection, absorption correction, and data reduction.<sup>S6</sup> The structures were solved using the GUI Olex2<sup>S8</sup> with the dual-space algorithm of SHELXT and refined by full-matrix least-squares methods on  $F^2$  with SHELXL-2014 refinement package using Least Squares minimisation.<sup>S7</sup> The compound C<sub>21</sub>H<sub>16</sub>N<sub>4</sub>O crystallized in the monoclinic crystal system, with the space group  $P2_1/c$ . All non-hydrogen atoms were refined anisotropically. Hydrogen atoms were inserted at calculated positions or if possible based on difference Fourier analysis and refined with a riding model or without restrictions.

**Table S2.** Crystal data and structure refinement for **4** (O-ABC-II cycloadduct).

|                     |                                                  |
|---------------------|--------------------------------------------------|
| Identification code | 2286852                                          |
| Empirical formula   | C <sub>21</sub> H <sub>16</sub> N <sub>4</sub> O |
| Formula weight      | 340.38                                           |
| Temperature/K       | 149.99(10)                                       |
| Crystal system      | monoclinic                                       |
| Space group         | $P2_1/c$                                         |
| a/Å                 | 9.11690(10)                                      |
| b/Å                 | 12.31300(10)                                     |

|                                               |                                                               |
|-----------------------------------------------|---------------------------------------------------------------|
| $c/\text{\AA}$                                | 14.85260(10)                                                  |
| $\alpha/^\circ$                               | 90                                                            |
| $\beta/^\circ$                                | 94.1900(10)                                                   |
| $\gamma/^\circ$                               | 90                                                            |
| Volume/ $\text{\AA}^3$                        | 1662.84(3)                                                    |
| Z                                             | 4                                                             |
| $\rho_{\text{calc}}/\text{cm}^3$              | 1.360                                                         |
| $\mu/\text{mm}^{-1}$                          | 0.696                                                         |
| F(000)                                        | 712.0                                                         |
| Crystal size/ $\text{mm}^3$                   | $0.303 \times 0.284 \times 0.160$                             |
| Radiation                                     | Cu K $\alpha$ ( $\lambda = 1.54184$ )                         |
| $2\Theta$ range for data collection/ $^\circ$ | 9.34 to 156.094                                               |
| Index ranges                                  | $-11 \leq h \leq 11, -15 \leq k \leq 15, -17 \leq l \leq 18$  |
| Reflections collected                         | 34000                                                         |
| Independent reflections                       | 3550 [ $R_{\text{int}} = 0.0397, R_{\text{sigma}} = 0.0181$ ] |
| Data/restraints/parameters                    | 3550/0/236                                                    |
| Goodness-of-fit on $F^2$                      | 1.061                                                         |
| Final R indexes [ $I \geq 2\sigma(I)$ ]       | $R_1 = 0.0345, wR_2 = 0.0881$                                 |
| Final R indexes [all data]                    | $R_1 = 0.0358, wR_2 = 0.0891$                                 |
| Largest diff. peak/hole / $e \text{\AA}^{-3}$ | 0.24/-0.18                                                    |

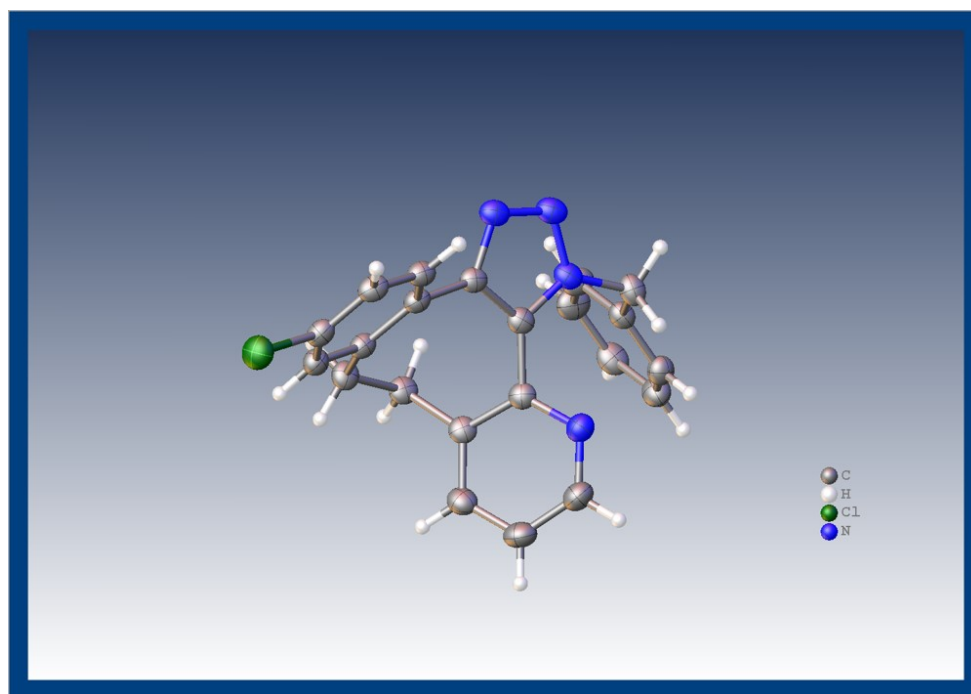

**Figure S6:** ORTEP diagram of **5** (ABC-BnN<sub>3</sub> cycloadduct) with 50% probability ellipsoids.

**Data collection.** A Single clear plate-shaped crystal of approximate dimension  $0.825 \times 0.137 \times 0.102$  mm<sup>3</sup> was adhered to a Mitegen loop with Paratone oil. Crystallographic data were collected at temperature 150 K on a Rigaku-Oxford Diffraction XtaLAB-Synergy-S diffractometer with a Hypix-6000HE (Hybrid Photon Counting) detector, using Cu-K $\alpha$  radiation of wavelength 1.54187 Å. The intensity data were measured by a  $\omega$ -scan with 0.5° oscillations for each frame with the intensity that is more than 10:1 for data-to-parameter ratio. The program suite CrysAlis<sup>Pro</sup> was used for data collection, absorption correction, and data reduction.<sup>S6</sup> The structures were solved using the GUI Olex2<sup>S8</sup> with the dual-space algorithm of SHELXT and refined by full-matrix least-squares methods on  $F^2$  with SHELXL-2014 refinement package using Least Squares minimisation.<sup>S7</sup> The compound C<sub>22</sub>H<sub>17</sub>ClN<sub>4</sub> crystallized in the monoclinic crystal system, with the space group P2<sub>1</sub>/c. All non-hydrogen atoms were refined anisotropically. Hydrogen atoms were inserted at calculated positions or if possible based on difference Fourier analysis and refined with a riding model or without restrictions.

**Table S3.** Crystal data and structure refinement for **5** (ABC cycloadduct).

|                                             |                                                               |
|---------------------------------------------|---------------------------------------------------------------|
| Identification code                         | 2286853                                                       |
| Empirical formula                           | C <sub>22</sub> H <sub>17</sub> ClN <sub>4</sub>              |
| Formula weight                              | 372.85                                                        |
| Temperature/K                               | 149.99(10)                                                    |
| Crystal system                              | monoclinic                                                    |
| Space group                                 | P2 <sub>1</sub> /c                                            |
| a/Å                                         | 10.93403(10)                                                  |
| b/Å                                         | 21.4604(2)                                                    |
| c/Å                                         | 7.91748(8)                                                    |
| $\alpha$ /°                                 | 90                                                            |
| $\beta$ /°                                  | 105.1277(9)                                                   |
| $\gamma$ /°                                 | 90                                                            |
| Volume/Å <sup>3</sup>                       | 1793.45(3)                                                    |
| Z                                           | 4                                                             |
| $\rho_{\text{calc}}/\text{cm}^3$            | 1.381                                                         |
| $\mu/\text{mm}^{-1}$                        | 1.990                                                         |
| F(000)                                      | 776.0                                                         |
| Crystal size/mm <sup>3</sup>                | 0.825 × 0.137 × 0.102                                         |
| Radiation                                   | Cu K $\alpha$ ( $\lambda$ = 1.54184)                          |
| 2 $\theta$ range for data collection/°      | 8.24 to 155.73                                                |
| Index ranges                                | -13 ≤ h ≤ 13, -23 ≤ k ≤ 27, -9 ≤ l ≤ 9                        |
| Reflections collected                       | 35683                                                         |
| Independent reflections                     | 3757 [R <sub>int</sub> = 0.0817, R <sub>sigma</sub> = 0.0316] |
| Data/restraints/parameters                  | 3757/0/244                                                    |
| Goodness-of-fit on F <sup>2</sup>           | 1.084                                                         |
| Final R indexes [I >= 2 $\sigma$ (I)]       | R <sub>1</sub> = 0.0470, wR <sub>2</sub> = 0.1328             |
| Final R indexes [all data]                  | R <sub>1</sub> = 0.0486, wR <sub>2</sub> = 0.1348             |
| Largest diff. peak/hole / e Å <sup>-3</sup> | 0.32/-0.39                                                    |

## Computational Details & Data

**Computational Details.** Gas phase geometry optimizations were performed with the Gaussian 16 software<sup>S9</sup> at the M06-2X level of theory<sup>S10</sup> with the 6-31G(d,p) basis set. Single point energies of located minima were performed at the M06-2X/6-311++G(d,p) level of theory, including the PCM solvation model for DMSO. Manual conformational searches were performed for both the SMs and TSs. Frequency calculations were performed to confirm stationary points as minima or first-order saddle points. All  $\Delta E$  and  $\Delta E^\ddagger$  values include zero-point corrections. Coordinates, total energies, and imaginary frequencies (transition states) are provided below. NBO analysis employed the NBO 7.0 program,<sup>S11</sup> implemented through the Gaussian 16 software.

**Table S4.** Energies and free energies of activation, and for cycloadditions of methyl azide with DIBO, ODIBO, ABC, O-ABC and O-ABC-II. Energies for the preferred regioisomer are in bold typeface.

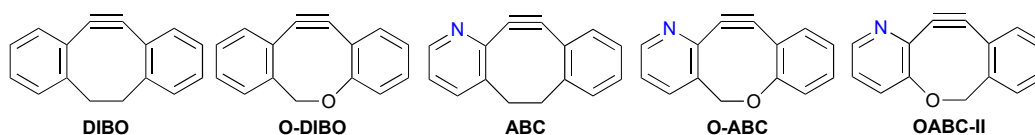

| Compound | <i>syn</i> TS       |                     | <i>anti</i> TS      |                     |
|----------|---------------------|---------------------|---------------------|---------------------|
|          | $\Delta E^\ddagger$ | $\Delta G^\ddagger$ | $\Delta E^\ddagger$ | $\Delta G^\ddagger$ |
| DIBO     | 10.8                | 23.6                | 10.8                | 23.6                |
| ODIBO    | 8.4                 | 21.1                | 9.1                 | 21.9                |
| ABC      | 10.0                | 22.4                | 11.1                | 23.9                |
| O-ABC    | 7.6                 | 20.0                | 9.4                 | 21.9                |
| O-ABC-II | 7.8                 | 20.2                | 8.7                 | 21.4                |

**Table S5.** Distortion/interaction (activation–strain) analysis for the preferred transition states of the cycloadditions of methyl azide with DIBO, ODIBO, ABC, and O-ABC. All energies in kcal/mol.

| Compound | $\Delta E^\ddagger_{\text{distortion}}$ |        |       | $\Delta E^\ddagger_{\text{interaction}}$ |
|----------|-----------------------------------------|--------|-------|------------------------------------------|
|          | 1,3-Dipole                              | Alkyne | Total |                                          |
| DIBO     | 15.9                                    | 3.1    | 19.0  | -8.3                                     |
| ODIBO    | 14.1                                    | 2.5    | 16.6  | -8.2                                     |
| ABC      | 14.3                                    | 2.7    | 17.0  | -7.0                                     |
| O-ABC    | 12.7                                    | 2.1    | 14.8  | -7.2                                     |
| O-ABC-II | 12.9                                    | 2.1    | 15.0  | -7.1                                     |

**Table S6.** Second-order perturbations ( $E_2$ ) obtained from natural bonding orbital analysis (NBO) for SMs and the TSs.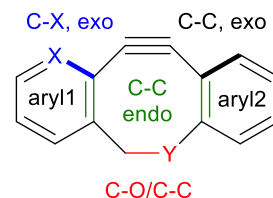

|                                                        | DIBO                           |                    | ODIBO                          |                    | ABC                            |                     | O-ABC                          |                                | O-ABC-II                       |                     |
|--------------------------------------------------------|--------------------------------|--------------------|--------------------------------|--------------------|--------------------------------|---------------------|--------------------------------|--------------------------------|--------------------------------|---------------------|
|                                                        | SM                             | TS                 | SM                             | TS                 | SM                             | TS                  | SM                             | TS                             | SM                             | TS                  |
| $\pi_{in} \rightarrow \pi_{aryl1/aryl2}^*$             | 0.6/0.6                        | 4.4/— <sup>a</sup> | 0.5/— <sup>a</sup>             | 5.9/0.9            | 0.7/0.7                        | — <sup>a</sup> /3.3 | 0.6/— <sup>a</sup>             | — <sup>a</sup> /0.8            | — <sup>a</sup> /0.6            | 0.9/5.6             |
| $\pi_{out} \rightarrow \pi_{aryl1/aryl2}^*$            | 15.6/15.6                      | 11.4/14.8          | 16.2/15.8                      | 10.5/14.4          | 19.4/14.9                      | 19.8/11.7           | 20.2/15.1                      | 20.5/14.0                      | 19.7/15.5                      | 19.1/10.4           |
| $\pi_{in} \rightarrow \sigma_{CX/CC, exo}^*$           | 4.5/4.5                        | 2.7/4.1            | 4.4/4.8                        | 2.4/4.2            | 5.6/4.3                        | 4.9/3.3             | 5.9/4.5                        | 4.8/4.3                        | 6.3/4.3                        | 5.2/2.8             |
| $\pi_{in} \rightarrow \sigma_{CC, endo (aryl1/2)}^*$   | 2.9/2.9                        | 2.7/3.7            | 3.0/3.1                        | 2.1/3.8            | 2.5/2.9                        | 2.8/3.1             | 2.4/3.3                        | 2.8/4.0                        | 2.7/3.0                        | 2.8/2.8             |
| $\pi_{in}^* \rightarrow \sigma_{CX/CC, exo}^*$         | — <sup>a</sup> /— <sup>a</sup> | 0.7/1.0            | — <sup>a</sup> /— <sup>a</sup> | 0.6/0.9            | — <sup>a</sup> /— <sup>a</sup> | 1.3/0.8             | — <sup>a</sup> /— <sup>a</sup> | 1.3/0.9                        | — <sup>a</sup> /— <sup>a</sup> | 1.3/0.6             |
| $\pi_{in}^* \rightarrow \sigma_{CC, endo (aryl1/2)}^*$ | — <sup>a</sup> /— <sup>a</sup> | 1.0/1.4            | — <sup>a</sup> /— <sup>a</sup> | 0.9/1.5            | — <sup>a</sup> /— <sup>a</sup> | 1.4/1.1             | — <sup>a</sup> /— <sup>a</sup> | 1.4/1.4                        | — <sup>a</sup> /— <sup>a</sup> | 1.4/0.9             |
| $\pi_{aryl1} \rightarrow \sigma_{CO/CC}^*$             | 3.9                            | 3.8                | 7.5                            | 7.6                | 4.0                            | 4.0                 | 7.7                            | 7.8                            | 2.8 <sup>b</sup>               | 2.7 <sup>b</sup>    |
| $n_O \rightarrow \pi_{aryl2}^*$                        | —                              | —                  | 16.9 <sup>c</sup>              | 16.9 <sup>c</sup>  | —                              | —                   | 17.1 <sup>c</sup>              | 16.5 <sup>c</sup>              | 16.8 <sup>c,d</sup>            | 16.4 <sup>c,d</sup> |
| $n_O \rightarrow \sigma_{aryl, endo}^*$                | —                              | —                  | 9.8 <sup>c</sup>               | 9.5 <sup>c</sup>   | —                              | —                   | 9.8 <sup>c</sup>               | 9.4 <sup>c</sup>               | 10.3 <sup>c</sup>              | 10.1 <sup>c</sup>   |
| $\pi_{aryl1/aryl2} \rightarrow \pi_{in}^*$             | 0.6/0.6                        | 4.8/— <sup>a</sup> | 0.5/— <sup>a</sup>             | 6.3/1.2            | — <sup>a</sup> /0.8            | — <sup>a</sup> /3.2 | — <sup>a</sup> /0.5            | — <sup>a</sup> /0.8            | — <sup>a</sup> /0.6            | 0.7/5.5             |
| $\pi_{aryl1/aryl2} \rightarrow \pi_{out}^*$            | 19.1/19.1                      | 14.9/20.2          | 18.5/19.6                      | 12.9/19.6          | 12.5/19.7                      | 12.9/17.7           | 12.1/20.3                      | 12.2/20.7                      | 12.8/19.1                      | 12.6/14.7           |
| $\sigma_{CC, endo (aryl1/2)} \rightarrow \pi_{in}^*$   | 3.6/3.6                        | 5.7/3.7            | 3.9/3.8                        | 5.0/5.4            | 3.3/3.7                        | 6.1/4.9             | 3.5/3.9                        | 6.4/5.5                        | 3.4/3.9                        | 6.1/4.4             |
| $\sigma_{CC, endo (aryl1/2)} \rightarrow \pi_{out}^*$  | — <sup>a</sup> /— <sup>a</sup> | 1.0/— <sup>a</sup> | — <sup>a</sup> /— <sup>a</sup> | 1.6/— <sup>a</sup> | — <sup>a</sup> /— <sup>a</sup> | — <sup>a</sup> /0.7 | — <sup>a</sup> /— <sup>a</sup> | — <sup>a</sup> /— <sup>a</sup> | — <sup>a</sup> /— <sup>a</sup> | — <sup>a</sup> /1.4 |

<sup>a</sup>The value is <0.5 kcal/mol, the default threshold for printing  $E_2$  interactions in the NBO program; <sup>b</sup>The value given for OABC-II is the  $\pi_{aryl1} \rightarrow \sigma_{OC}^*$  interaction; <sup>c</sup>The value is the sum of interactions for both lone pairs on oxygen; <sup>d</sup>The value given for O-ABC-II is the  $n_O \rightarrow \pi_{aryl1}$  interaction.



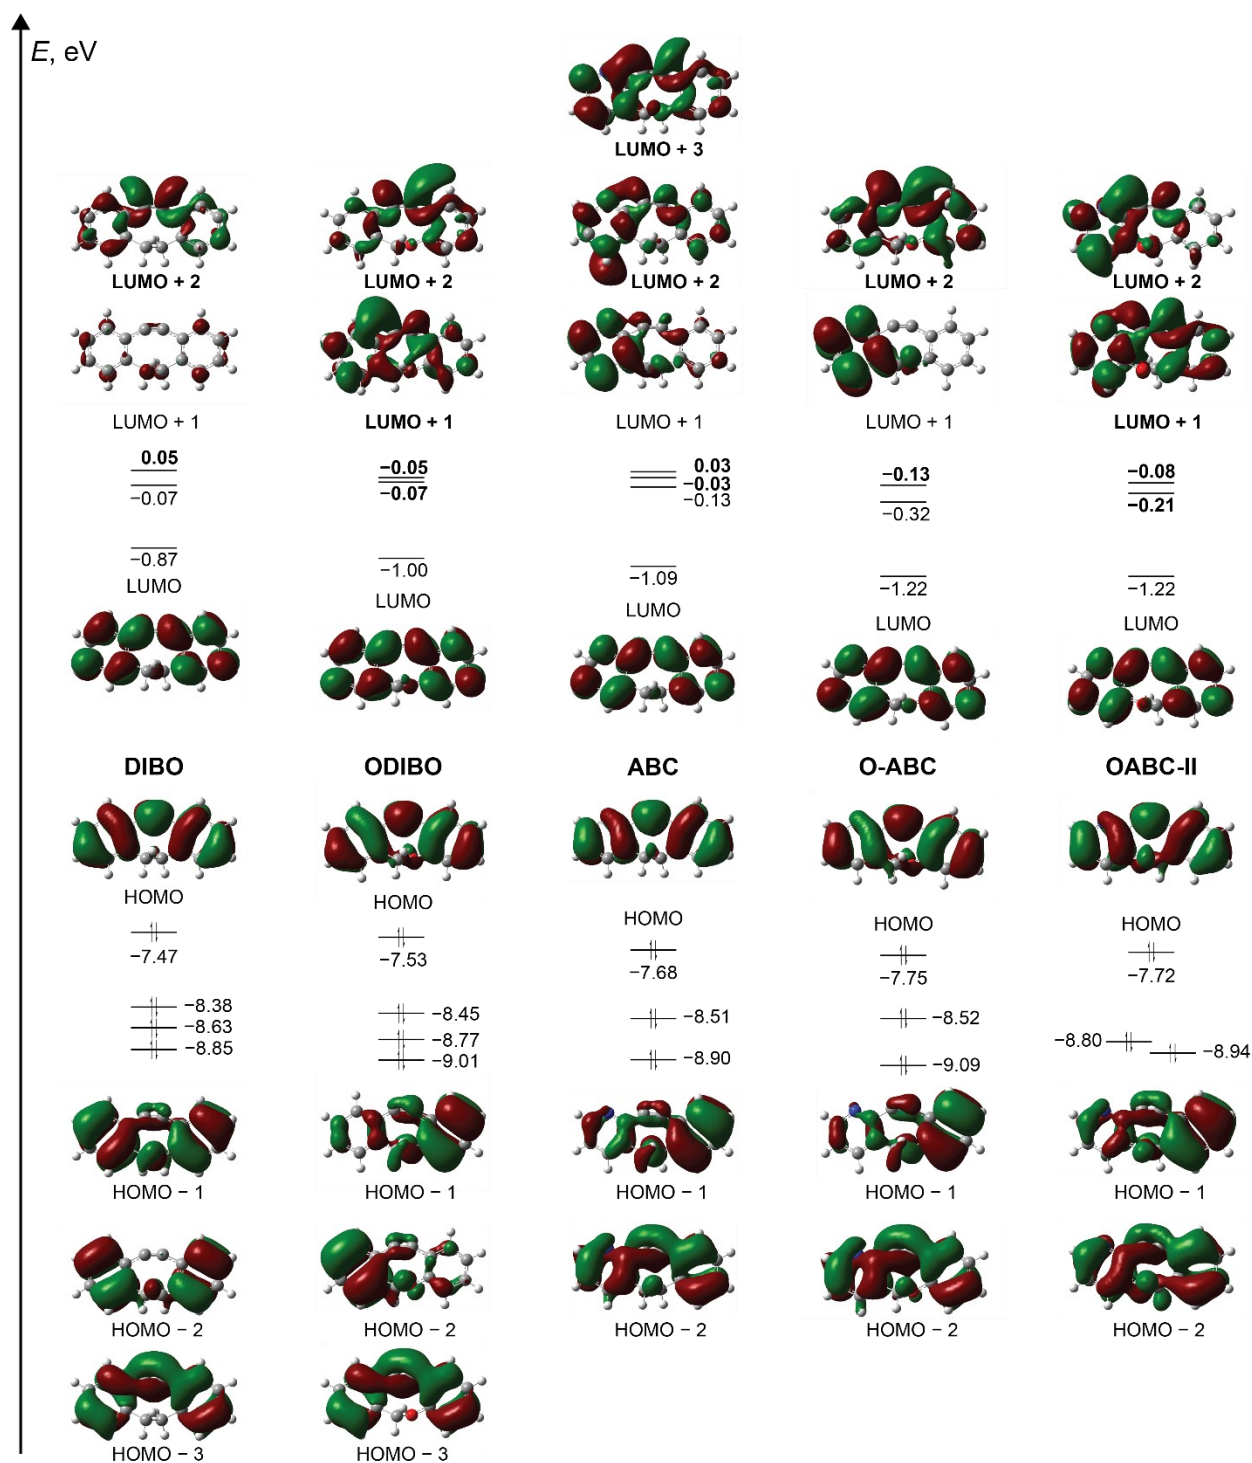

**Figure S7.** Orbital diagrams and energies (eV) calculated at the M06-2X/6-311++G(d,p)-CPCM(DMSO)/M06-2X/6-31G(d) level of theory.

## NMR Spectra

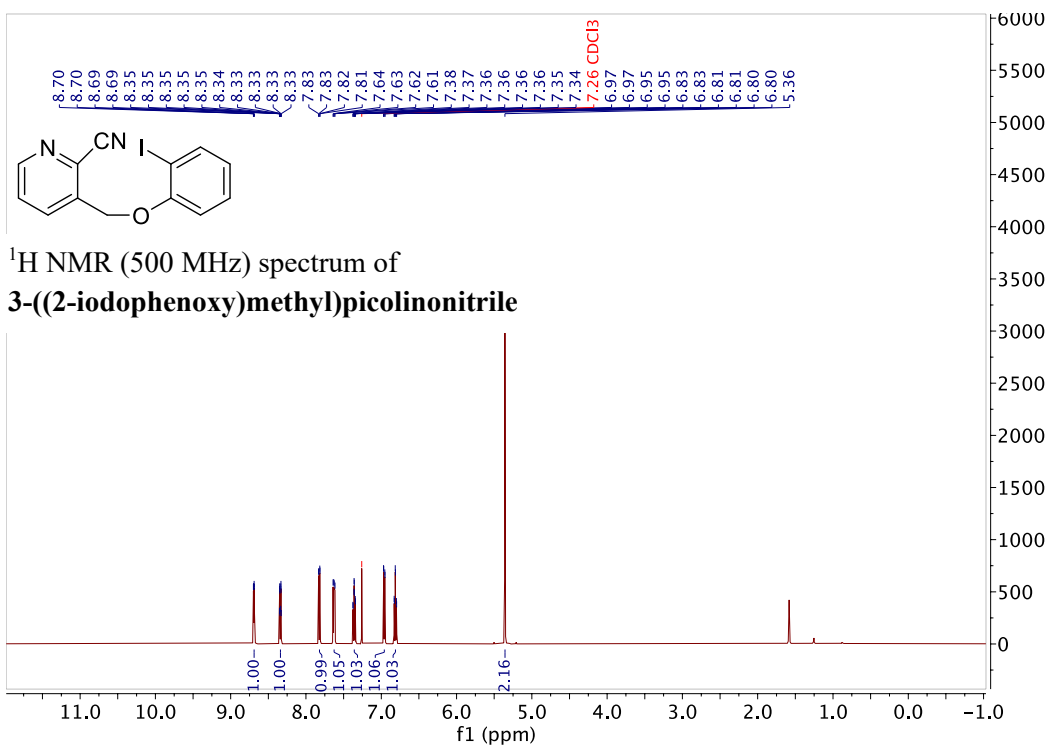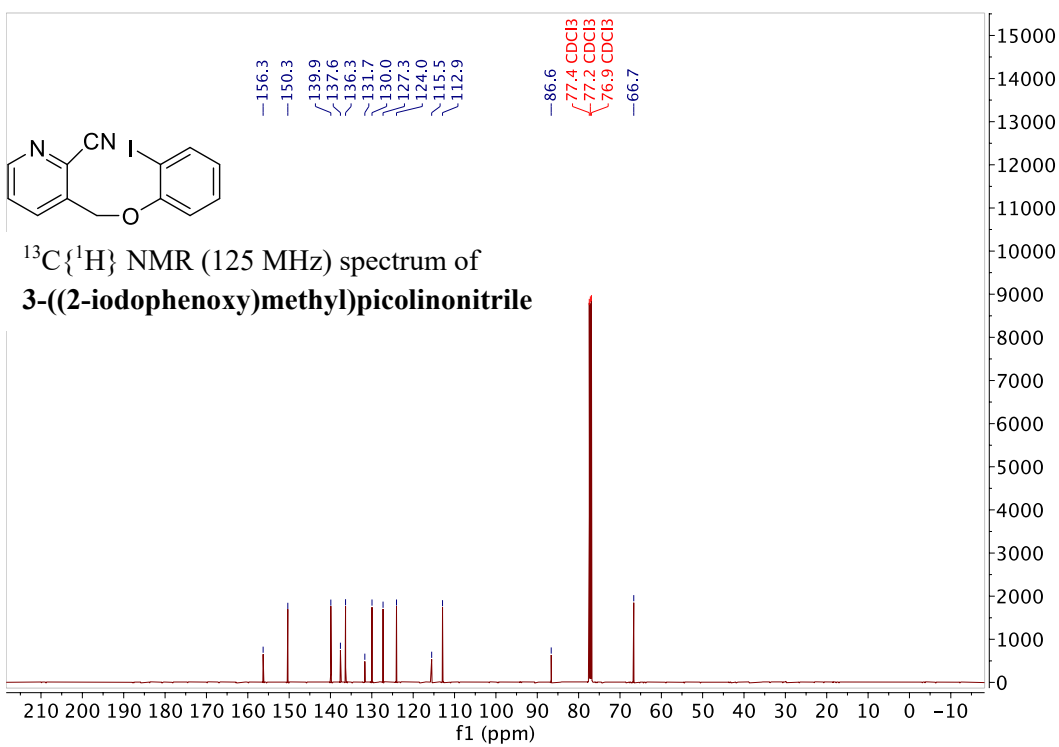

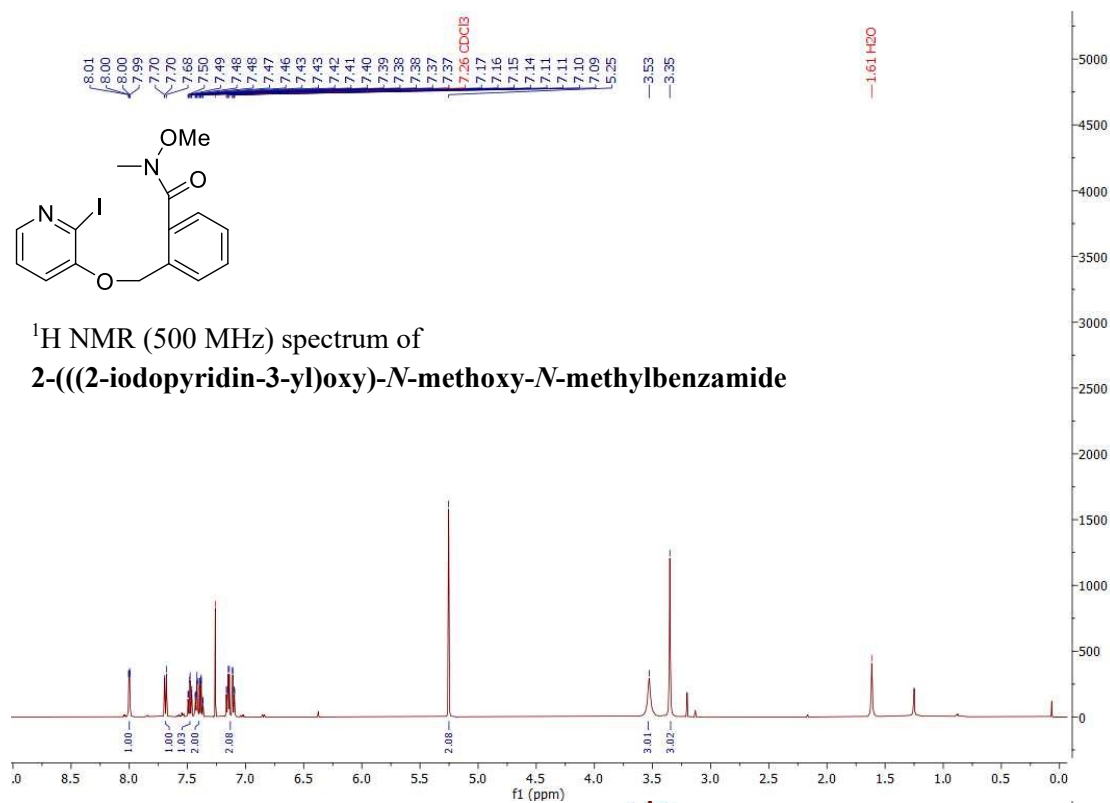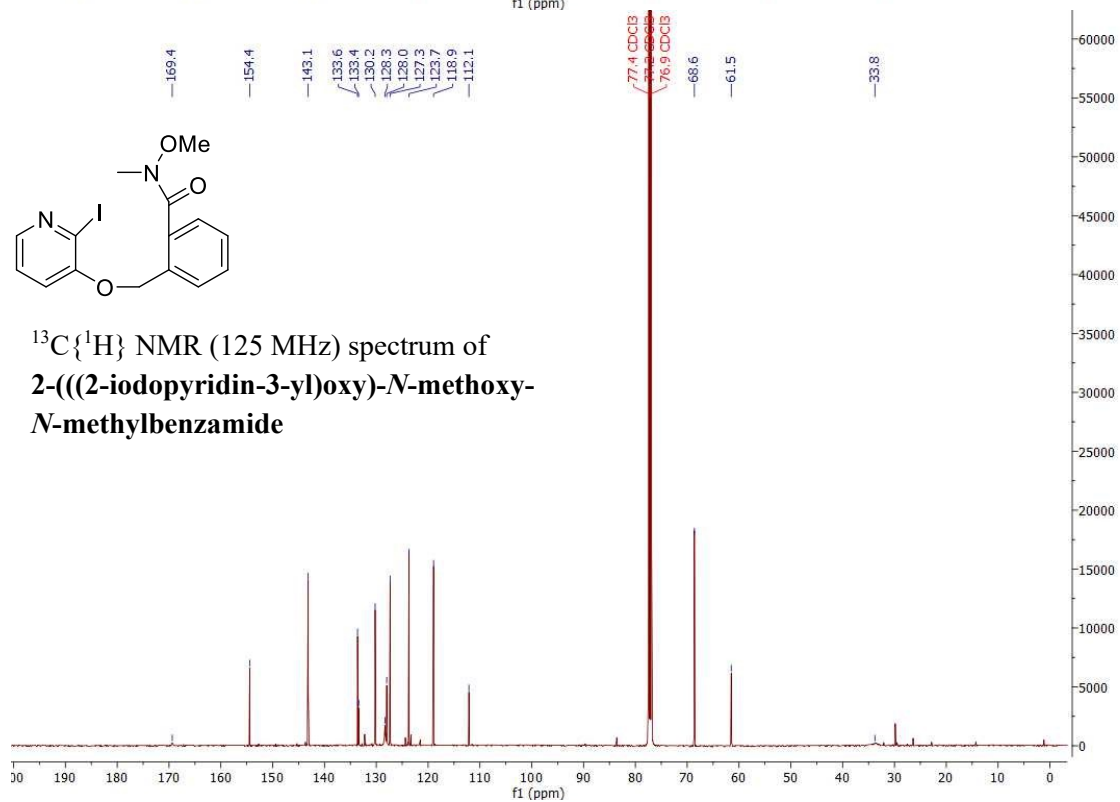

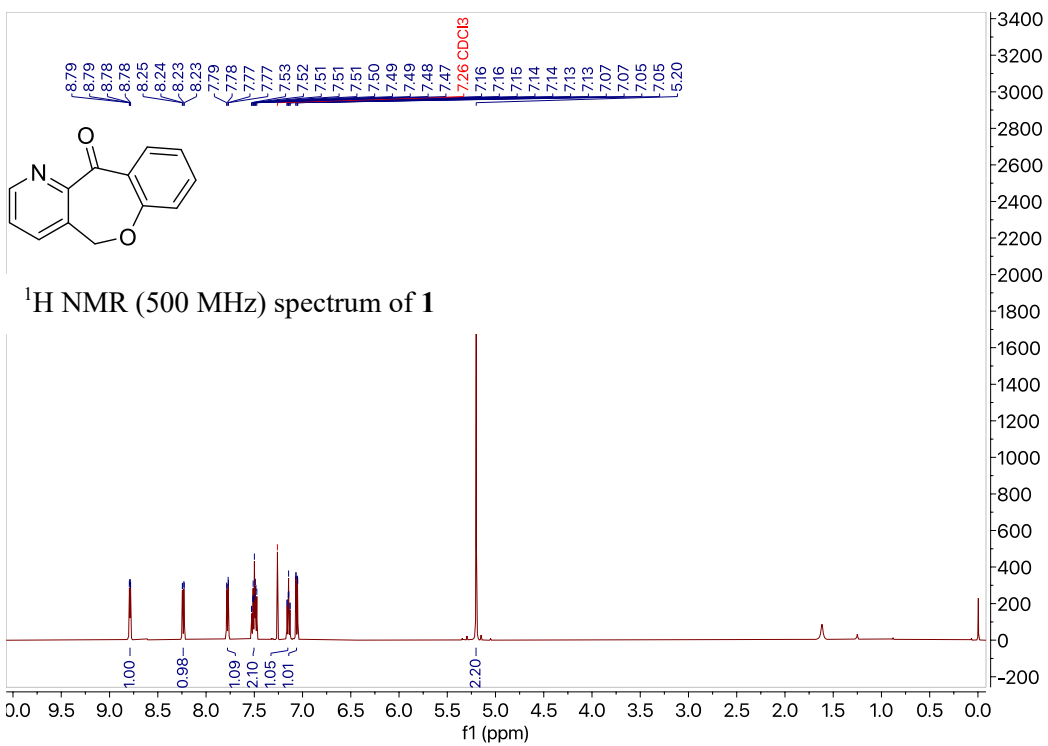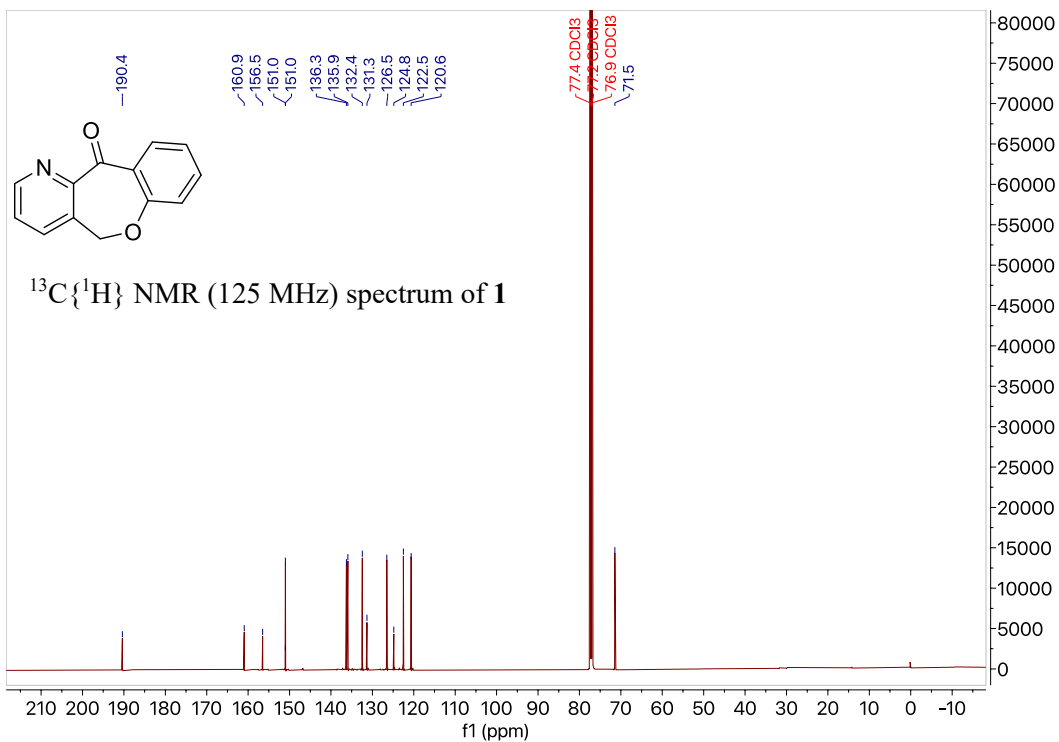

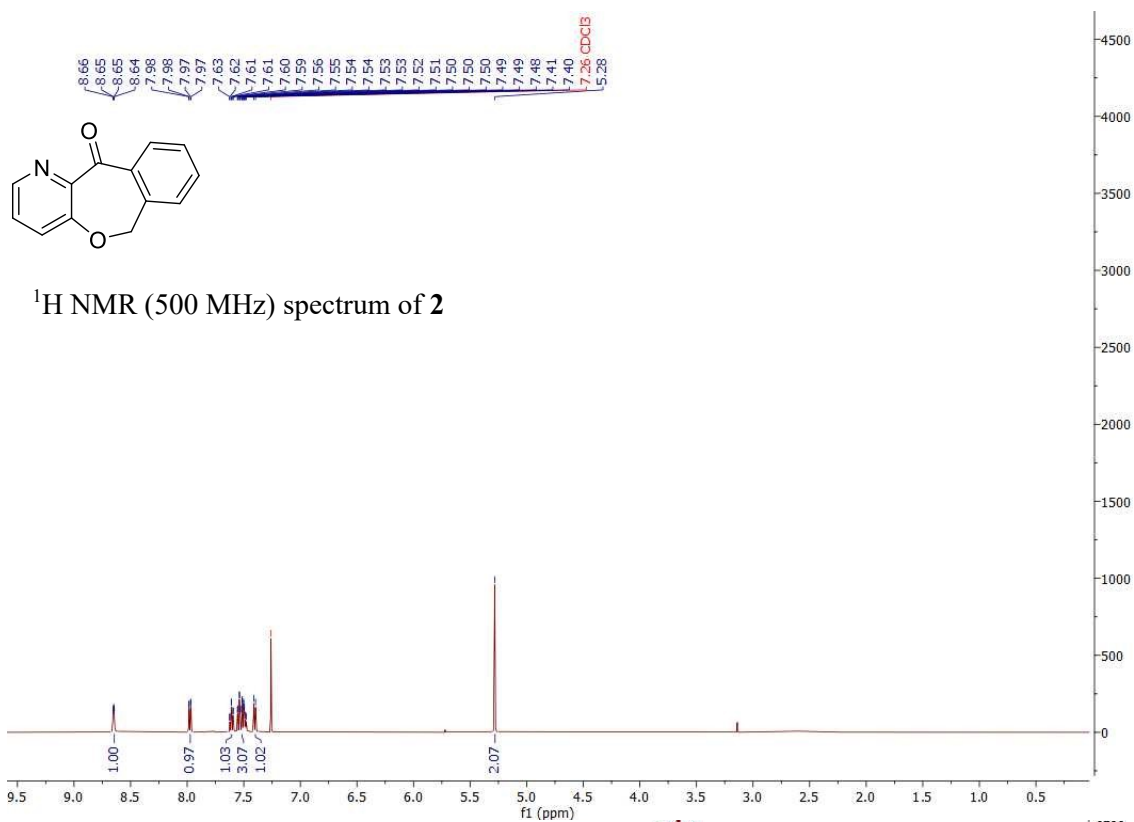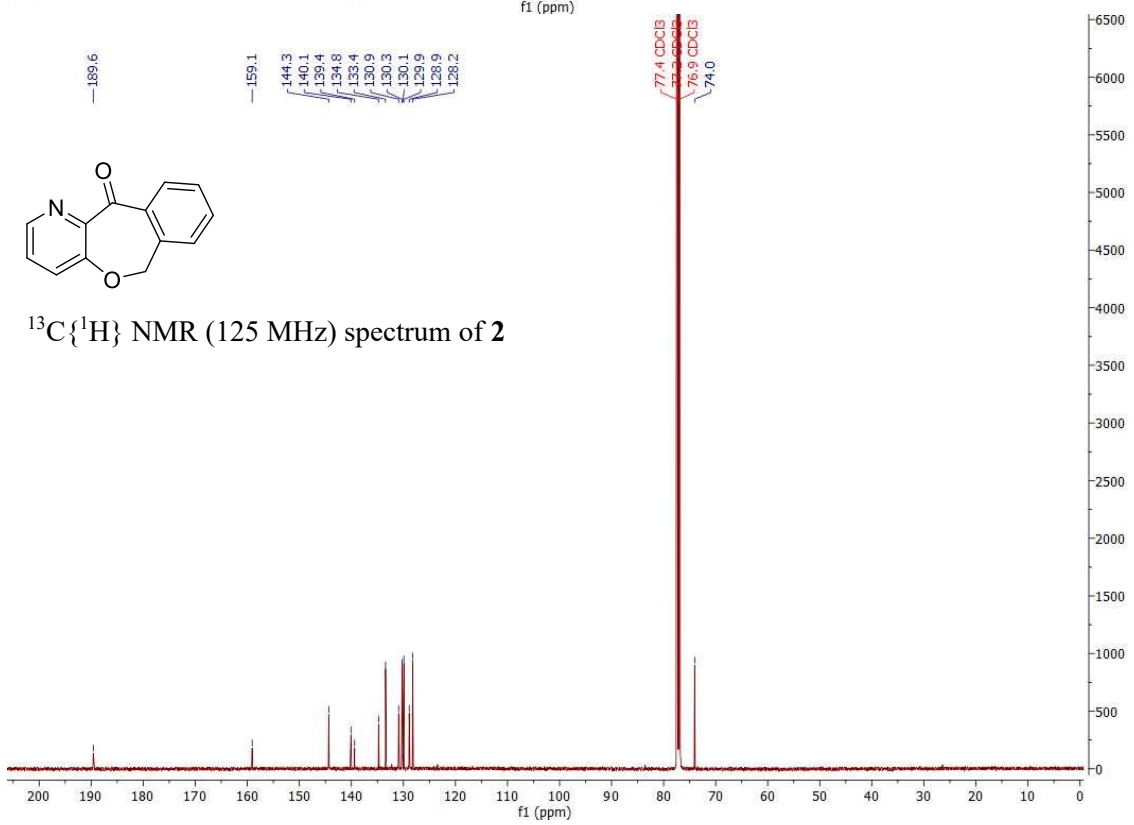

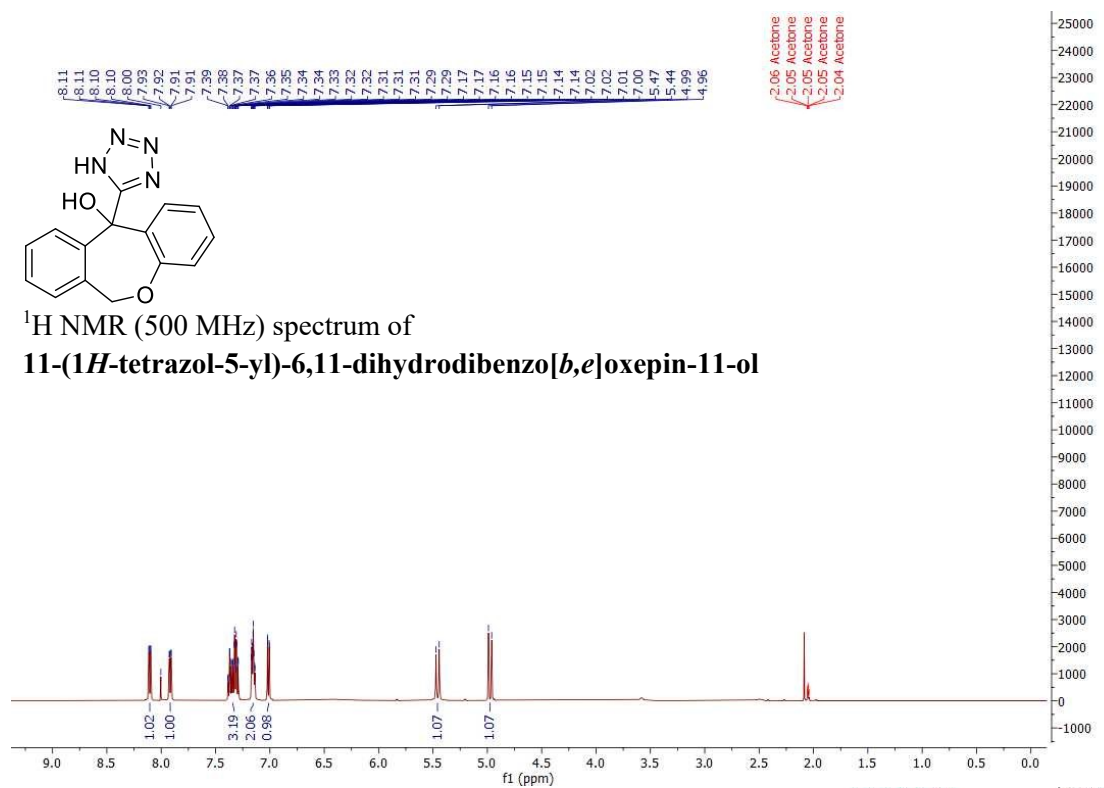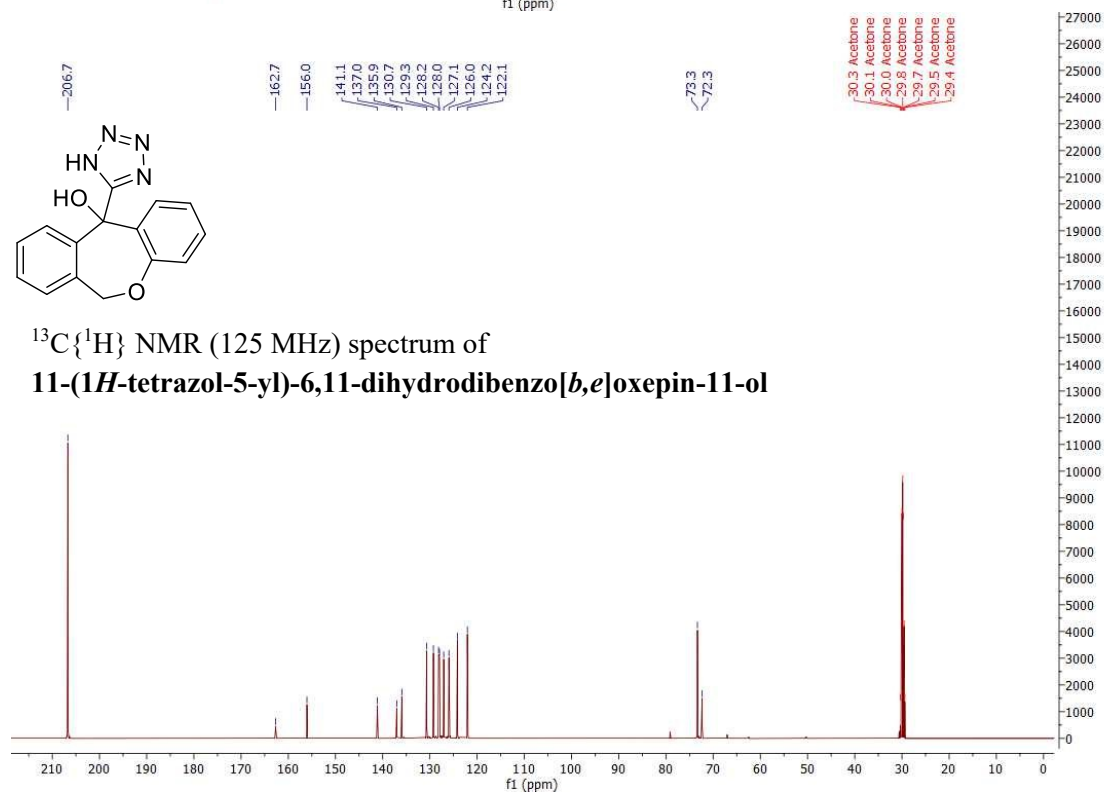

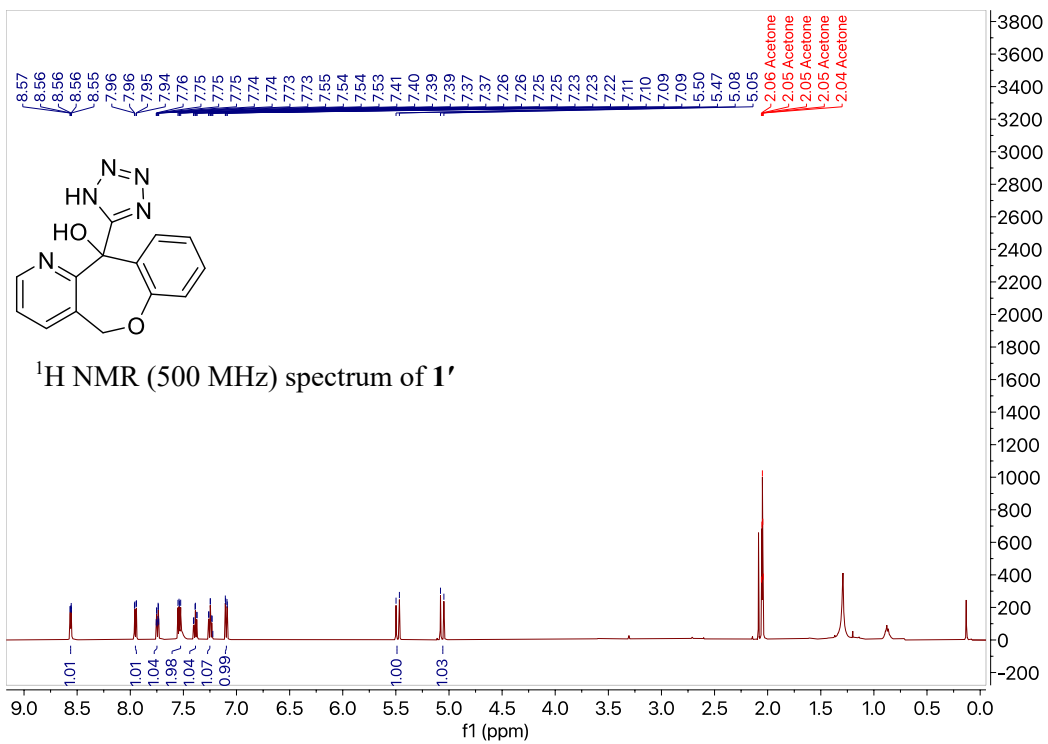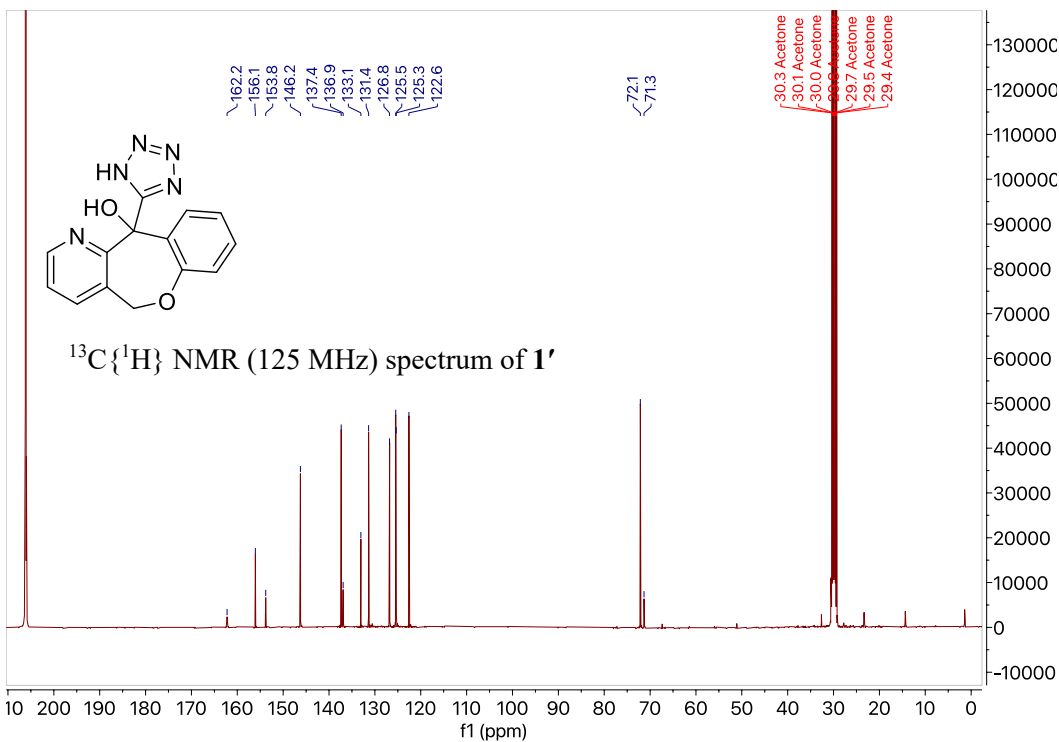

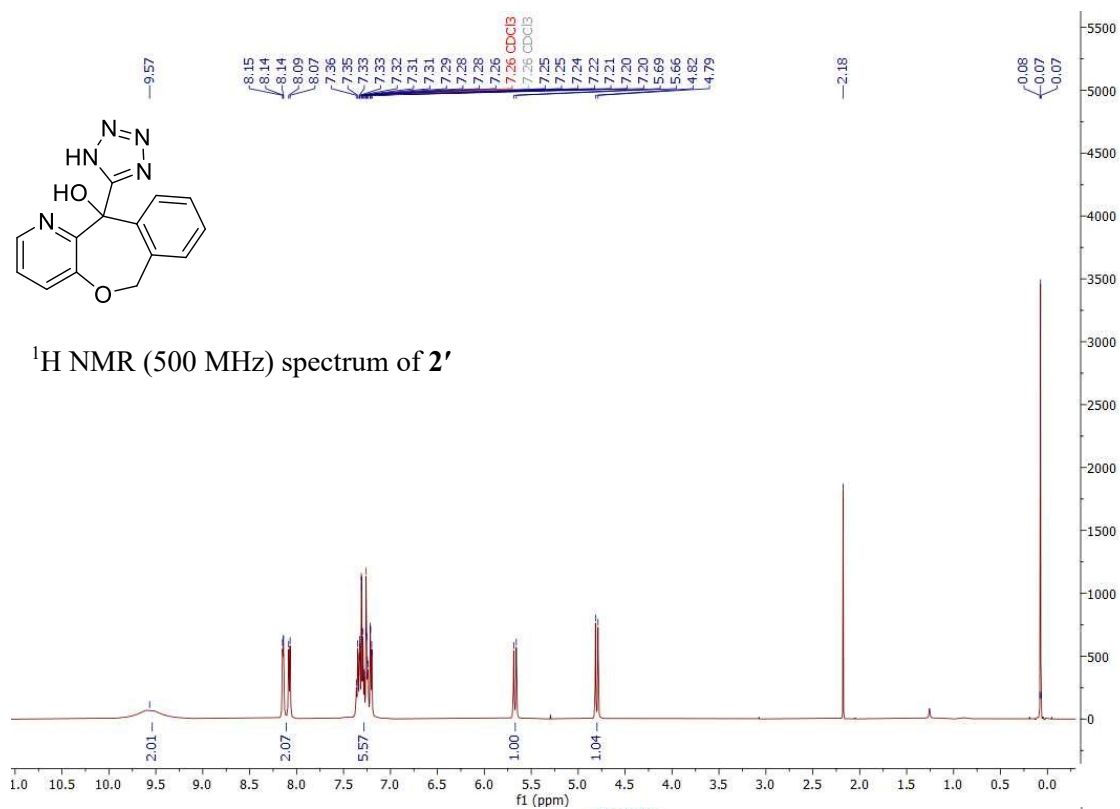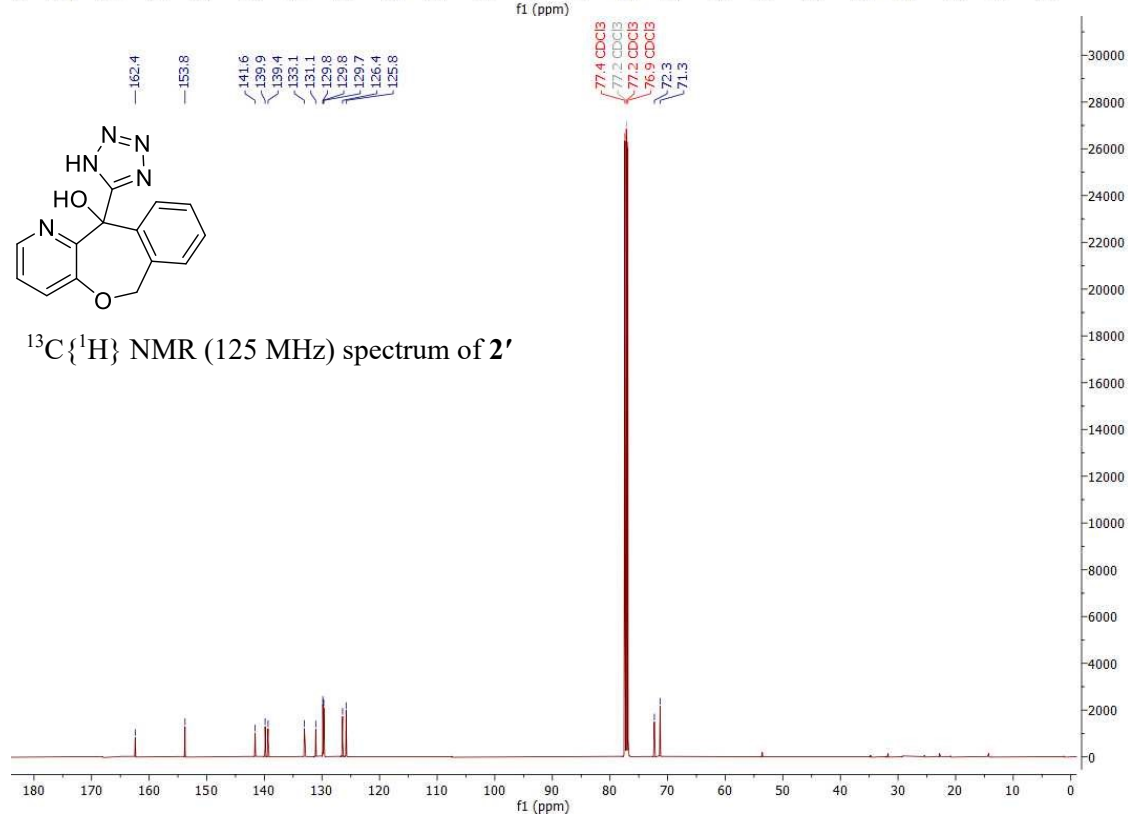



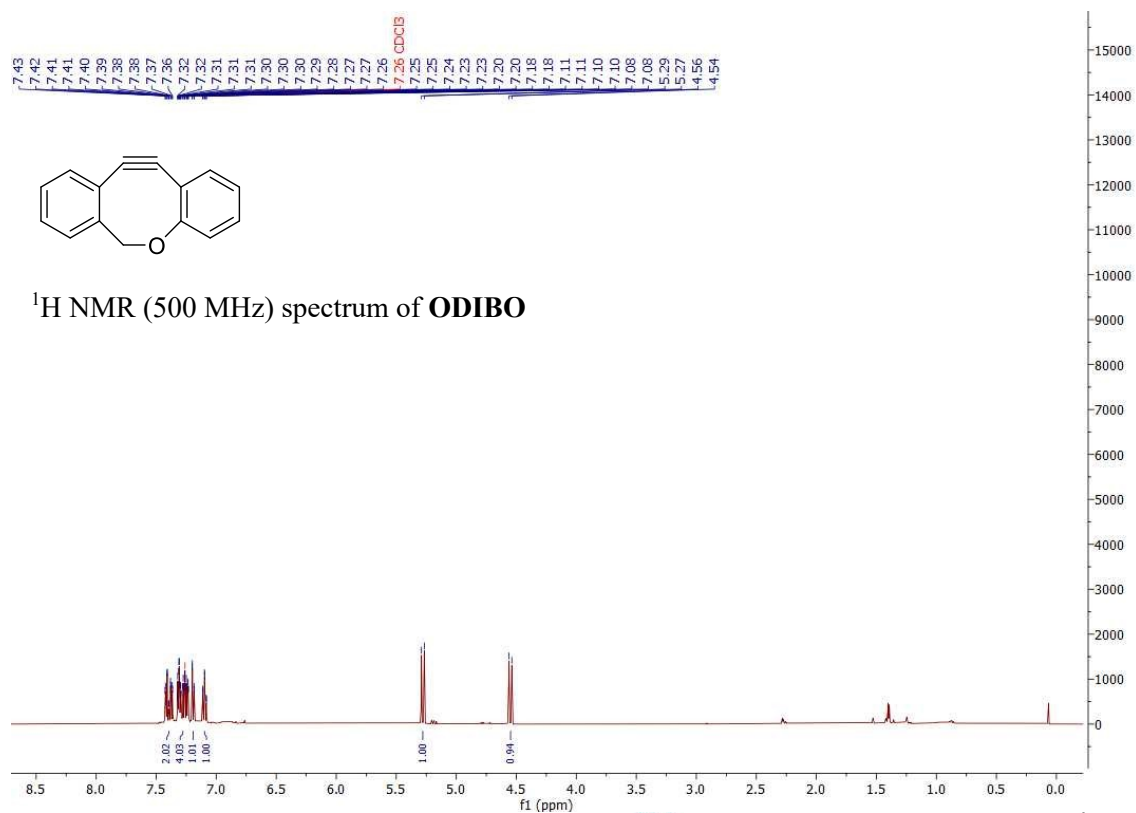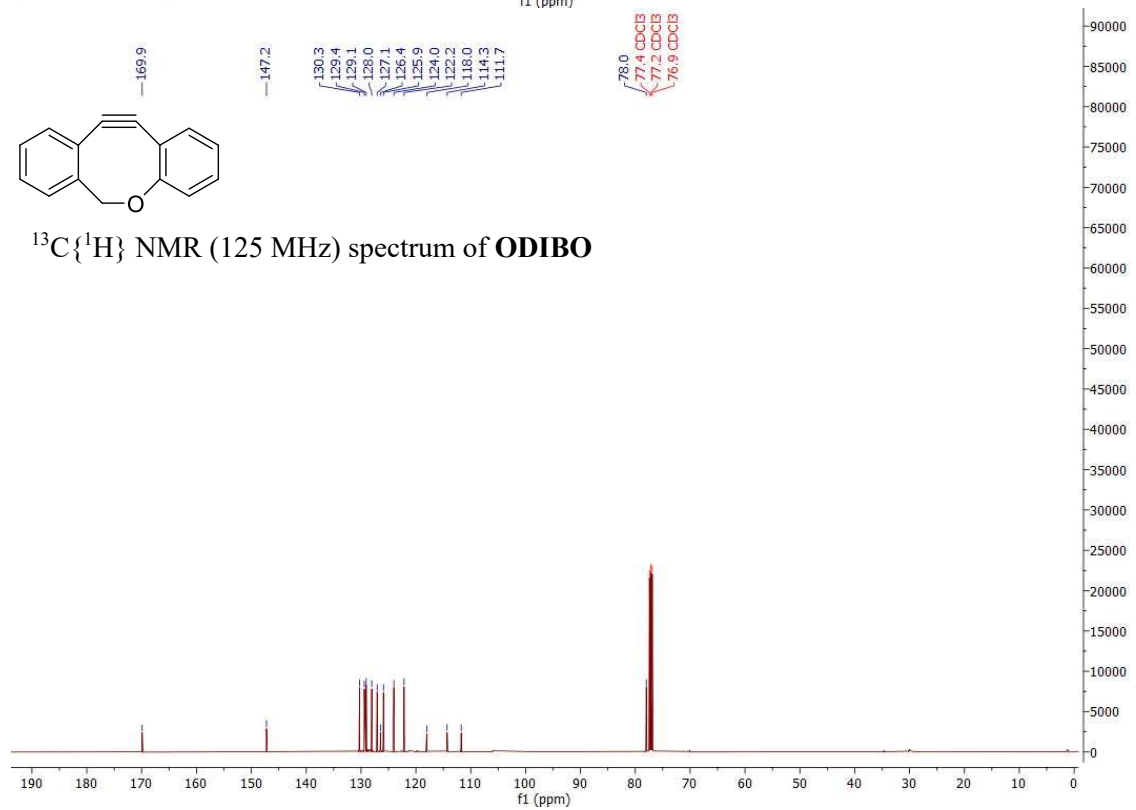

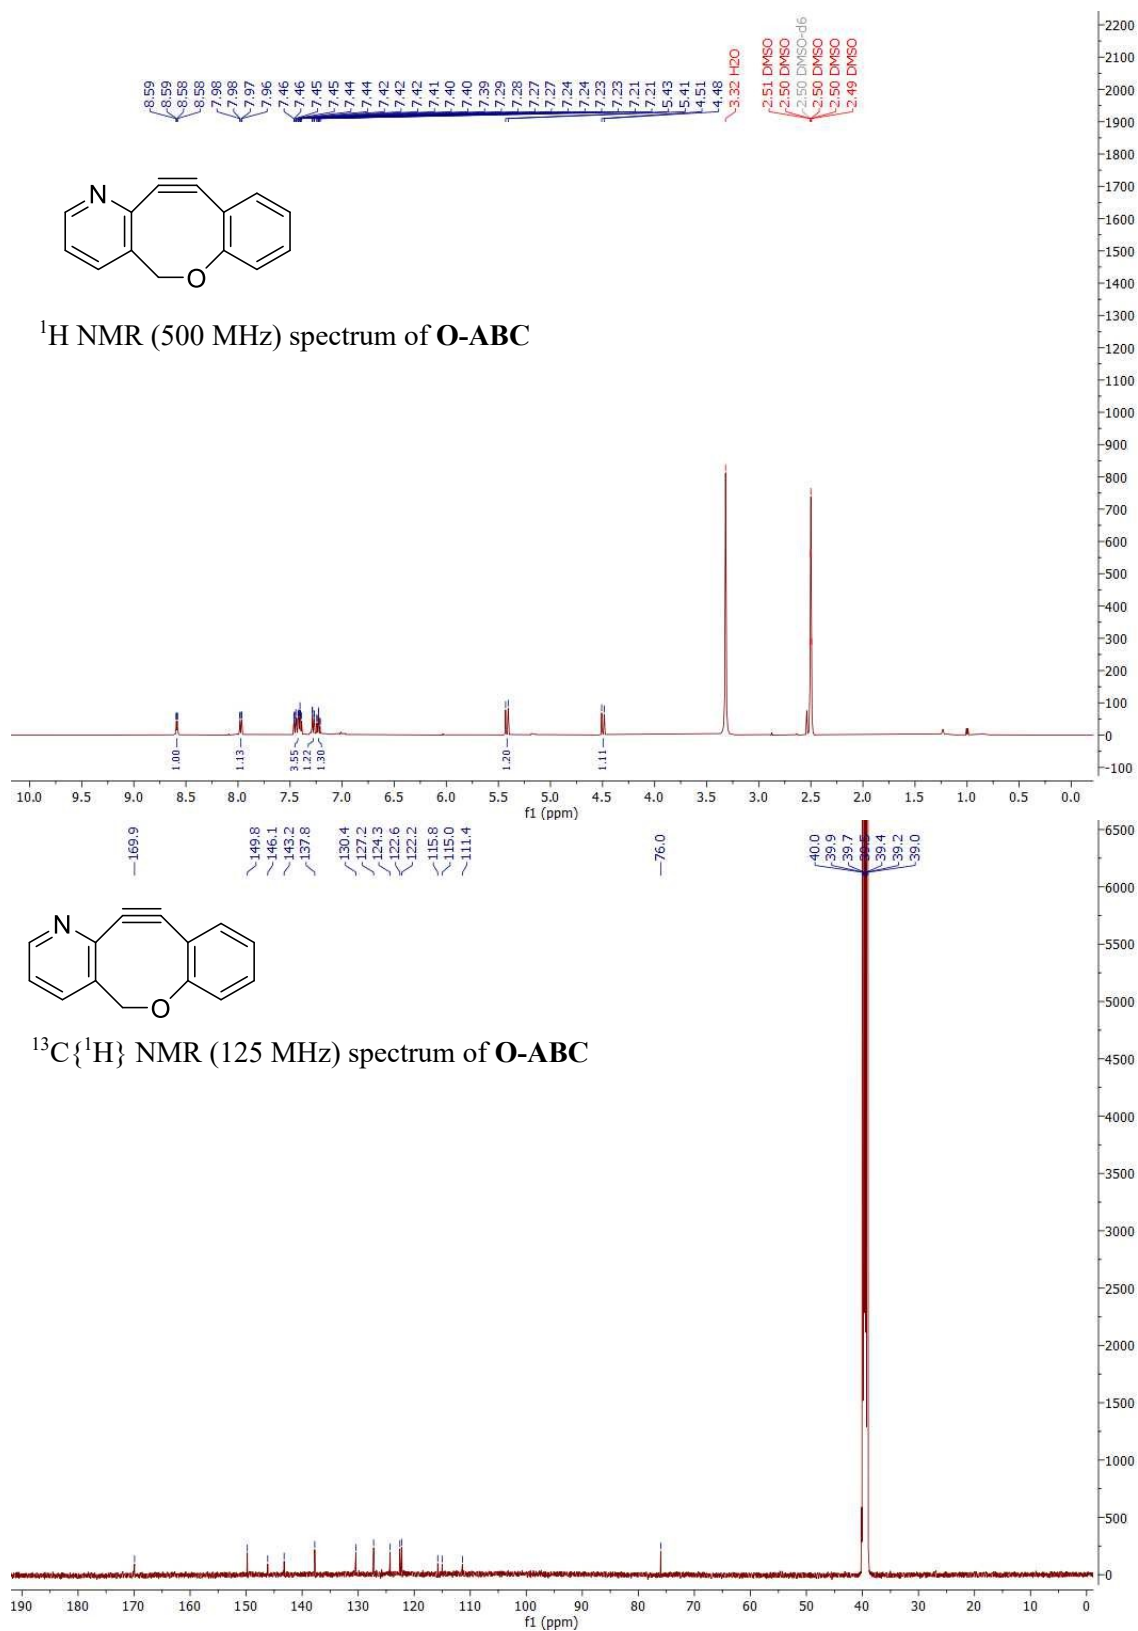

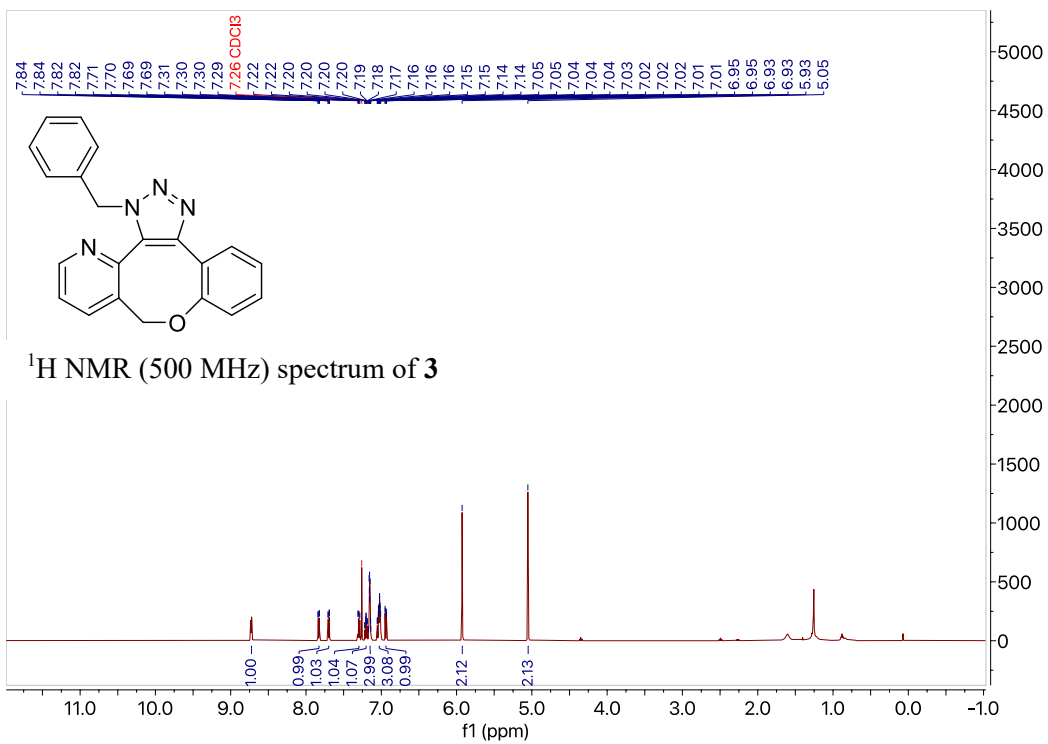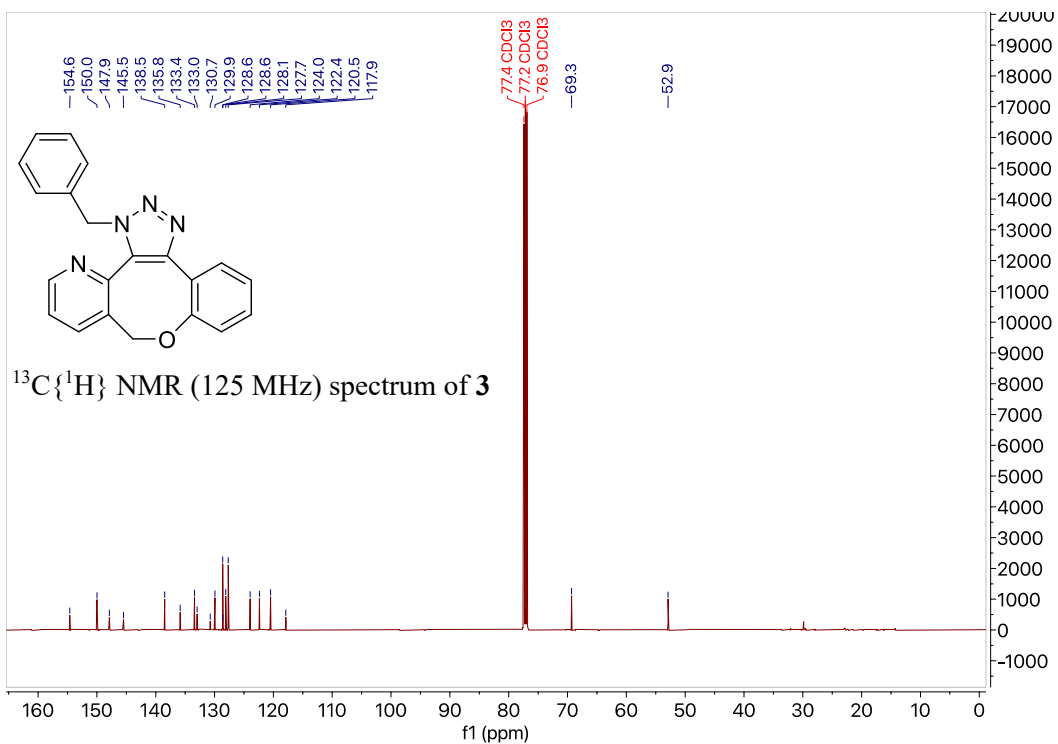

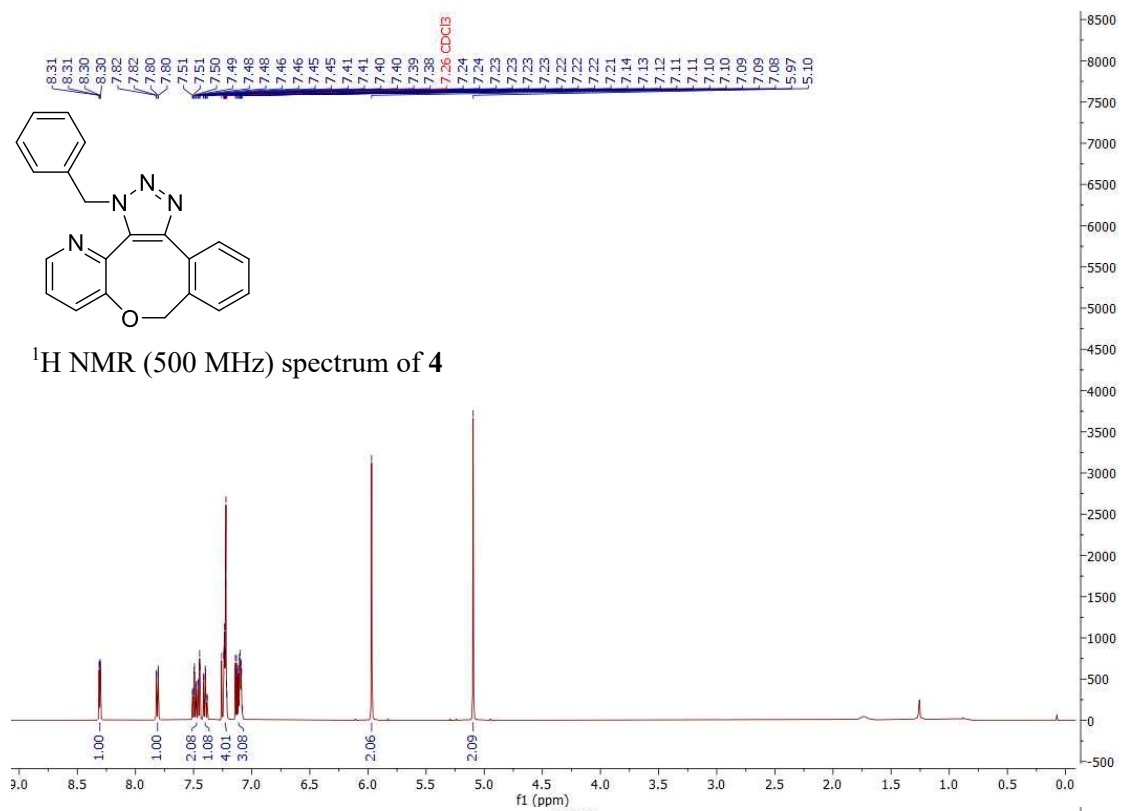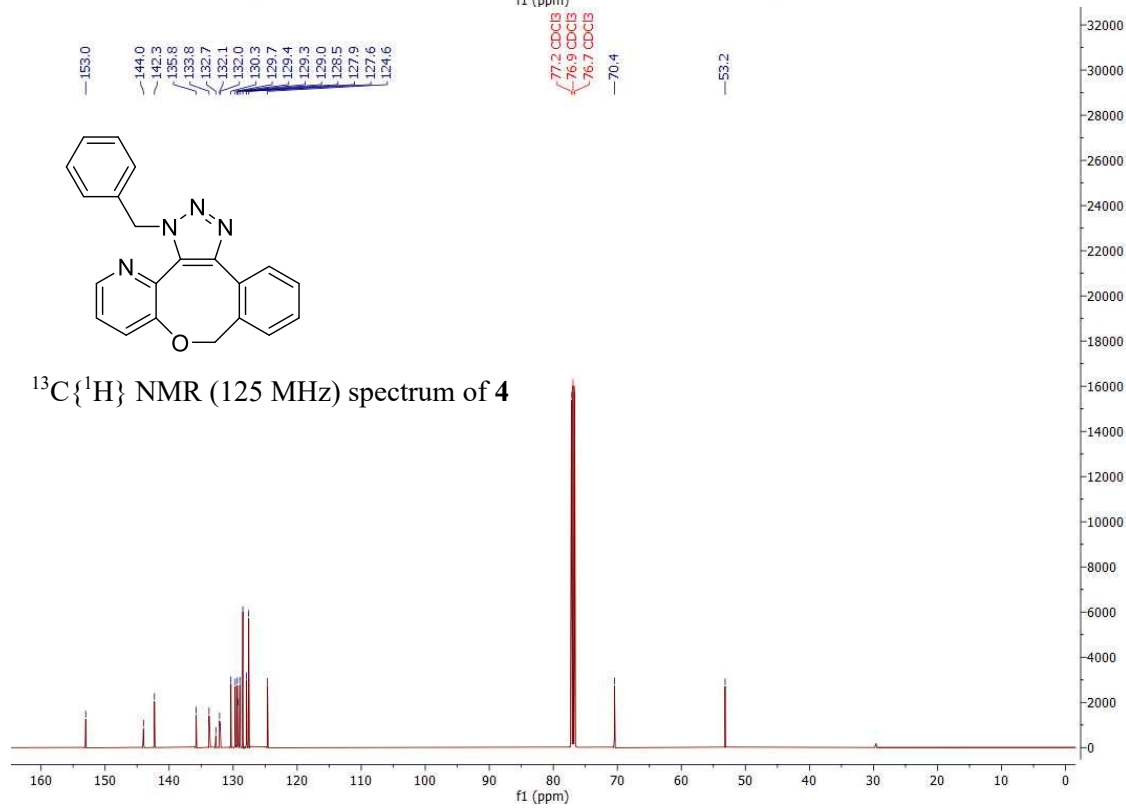

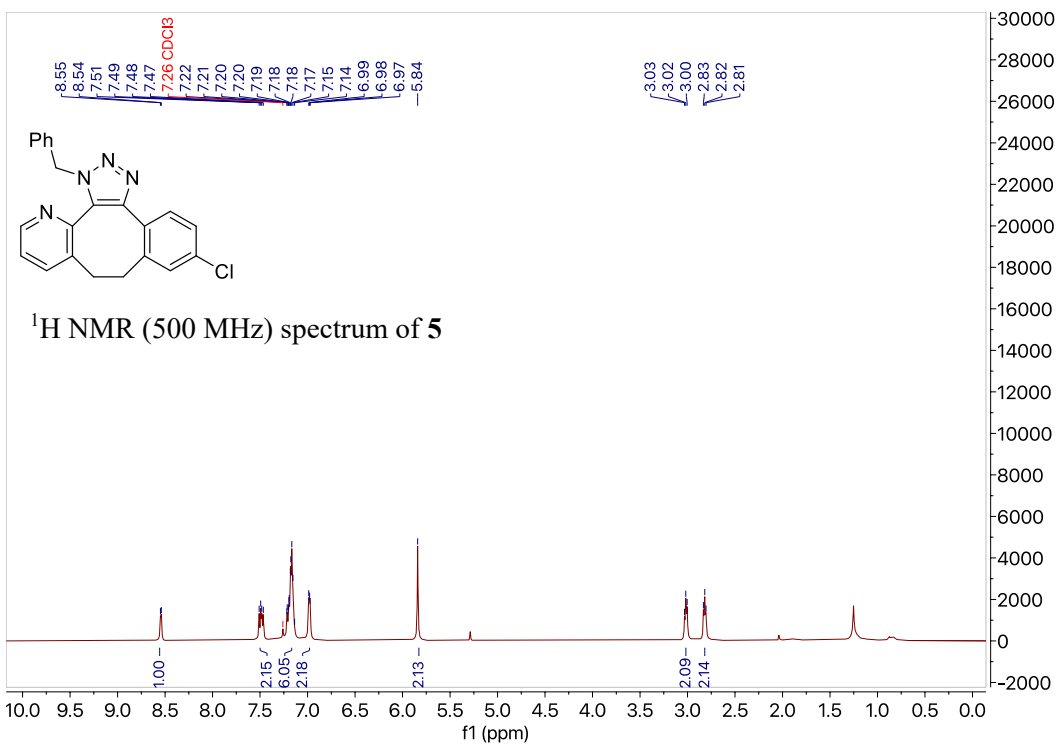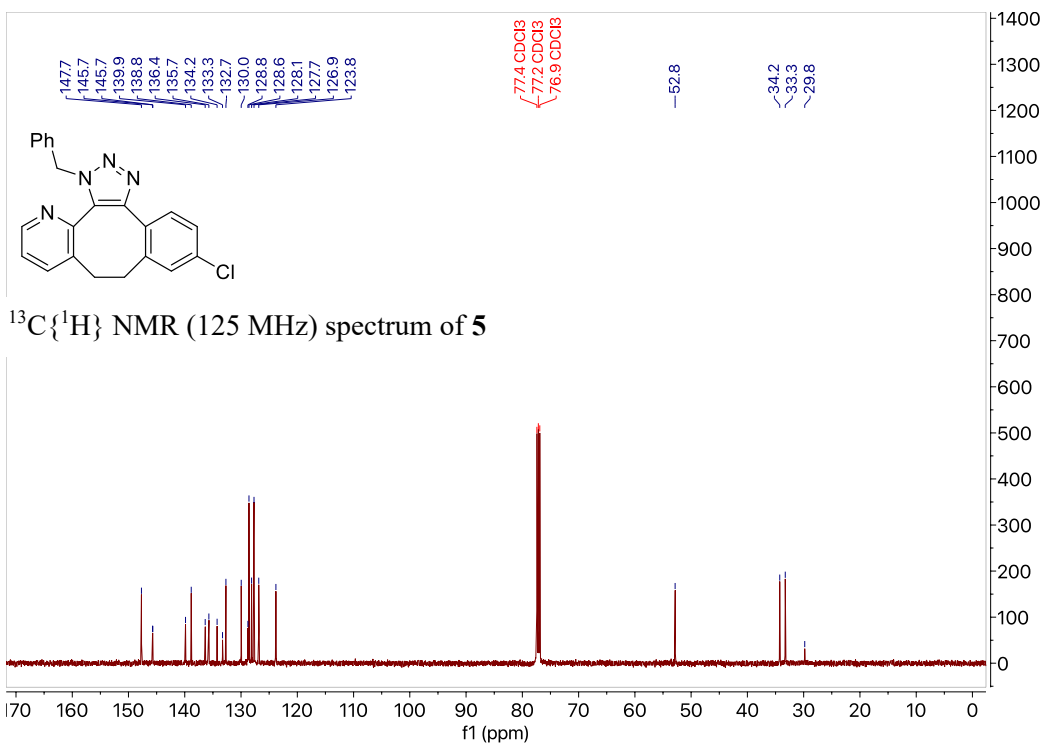

**Cartesian Coordinates (Å), Total Energies (Hartree), and Imaginary Frequencies (cm<sup>-1</sup>; TS's)****O-ABC**

|   |             |             |             |
|---|-------------|-------------|-------------|
| C | 4.13535200  | -0.74572600 | -0.13972100 |
| C | 2.88714500  | -1.34390800 | -0.29282000 |
| C | 1.73378000  | -0.57155400 | -0.21533100 |
| C | 1.83647300  | 0.82115400  | 0.02469200  |
| C | 3.09512100  | 1.40434100  | 0.18638500  |
| C | 4.24130400  | 0.62292600  | 0.10420200  |
| H | 5.03134600  | -1.35450900 | -0.20873200 |
| H | 2.78566800  | -2.40628100 | -0.48759400 |
| H | 3.16036500  | 2.47153100  | 0.37011800  |
| H | 5.21729800  | 1.08062500  | 0.22558300  |
| C | 0.56959200  | 1.47363300  | 0.07231400  |
| C | -0.64294700 | 1.48819400  | 0.03360400  |
| C | -0.44733000 | -1.19640000 | 0.61230300  |
| H | -0.60050300 | -2.25023700 | 0.86842500  |
| H | -0.03952300 | -0.68385900 | 1.49019000  |
| C | -1.90737800 | 0.81348900  | 0.02265300  |
| C | -1.77949900 | -0.58154600 | 0.24292300  |
| C | -2.94190600 | -1.33756500 | 0.18161800  |
| H | -2.89790000 | -2.41298600 | 0.33556400  |
| C | -4.15996500 | 0.67496000  | -0.25115600 |
| C | -4.15657500 | -0.70520100 | -0.07273300 |
| H | -5.09211000 | 1.20206500  | -0.43994500 |
| H | -5.08246700 | -1.26692000 | -0.12701900 |
| N | -3.06372600 | 1.43394100  | -0.21039000 |
| O | 0.52311500  | -1.16472400 | -0.45093200 |

Sum of electronic and zero-point Energies: -668.50984

Sum of electronic and thermal Energies: -668.49871

Sum of electronic and thermal Enthalpies: -668.49776

Sum of electronic and thermal Free Energies: -668.54693

**ABC**

|   |             |             |             |
|---|-------------|-------------|-------------|
| C | -4.25093700 | 0.65339000  | -0.01435500 |
| C | -3.04182300 | 1.30711000  | -0.24828600 |
| C | -1.83790700 | 0.60792900  | -0.26659400 |
| C | -1.87719700 | -0.78926300 | -0.02740000 |
| C | -3.08801500 | -1.44464800 | 0.20270900  |
| C | -4.27522100 | -0.72135800 | 0.20656800  |
| H | -5.17672300 | 1.22025500  | -0.00952900 |
| H | -3.03408400 | 2.37911000  | -0.42797200 |
| H | -3.08719800 | -2.51473600 | 0.38165200  |
| H | -5.21753400 | -1.22900000 | 0.38539200  |
| C | -0.58348300 | -1.39493700 | -0.00526300 |
| C | 0.62991600  | -1.41391700 | -0.02115900 |
| C | 0.53776400  | 1.28125700  | 0.58663900  |
| H | 0.74715600  | 2.31270500  | 0.88584300  |
| H | 0.09737600  | 0.78587800  | 1.45918800  |
| C | 1.92047600  | -0.78811200 | 0.01439000  |
| C | 1.85471200  | 0.60611700  | 0.27088000  |
| C | 3.06239200  | 1.29533700  | 0.25337800  |
| H | 3.07426200  | 2.36660100  | 0.43904200  |
| C | 4.18473700  | -0.76646000 | -0.20914100 |
| C | 4.24720400  | 0.60702600  | 0.00945500  |
| H | 5.09191200  | -1.33711100 | -0.39318200 |
| H | 5.20220300  | 1.12094500  | -0.00492200 |
| N | 3.04917000  | -1.46327000 | -0.21348000 |
| C | -0.52125800 | 1.29271000  | -0.57151500 |
| H | -0.07965500 | 0.81527600  | -1.45366800 |
| H | -0.73007000 | 2.32987900  | -0.84931700 |

Sum of electronic and zero-point Energies: -632.58783

Sum of electronic and thermal Energies: -632.5765

Sum of electronic and thermal Enthalpies: -632.57556  
 Sum of electronic and thermal Free Energies: -632.62501

**ODIBO**

|   |             |             |             |
|---|-------------|-------------|-------------|
| C | -4.17266000 | -0.76072200 | -0.04753800 |
| C | -2.93001800 | -1.34712500 | 0.19490100  |
| C | -1.77498800 | -0.57543200 | 0.24076600  |
| C | -1.88396900 | 0.82094200  | 0.02385600  |
| C | -3.12620200 | 1.40719900  | -0.21524700 |
| C | -4.26892500 | 0.61319500  | -0.24764800 |
| H | -5.06425300 | -1.37872000 | -0.07902400 |
| H | -2.85905400 | -2.42014900 | 0.35354400  |
| H | -3.18813000 | 2.47770800  | -0.37957000 |
| H | -5.23594100 | 1.06899800  | -0.43512000 |
| C | -0.61719000 | 1.47997600  | 0.03702700  |
| C | -0.43888500 | -1.19227800 | 0.59891000  |
| H | -0.02816800 | -0.68889200 | 1.48096200  |
| H | -0.58675400 | -2.24953300 | 0.84277200  |
| C | 0.59549200  | 1.48789800  | 0.08505100  |
| C | 1.85871600  | 0.82739300  | 0.02975100  |
| C | 1.74481900  | -0.56326900 | -0.22226600 |
| C | 2.89256700  | -1.34384300 | -0.30306100 |
| H | 2.78224900  | -2.40378700 | -0.50642100 |
| C | 3.12222800  | 1.39744500  | 0.19828100  |
| H | 3.19684800  | 2.46241000  | 0.39166900  |
| C | 4.26255500  | 0.60745900  | 0.11115900  |
| C | 4.14603000  | -0.75810600 | -0.14335600 |
| H | 5.24203000  | 1.05641400  | 0.23789900  |
| H | 5.03697200  | -1.37394800 | -0.21556400 |
| O | 0.53084800  | -1.14436200 | -0.46683500 |

Sum of electronic and zero-point Energies: -652.45727

Sum of electronic and thermal Energies: -652.44598

Sum of electronic and thermal Enthalpies: -652.44504

Sum of electronic and thermal Free Energies: -652.49443

**DIBO**

|   |             |             |             |
|---|-------------|-------------|-------------|
| C | -4.26372400 | -0.66385300 | 0.02137200  |
| C | -3.04966200 | -1.30766500 | 0.25769700  |
| C | -1.84975700 | -0.60127800 | 0.27043200  |
| C | -1.89801500 | 0.79453500  | 0.02170600  |
| C | -3.11378600 | 1.43959900  | -0.21119300 |
| C | -4.29675800 | 0.70912400  | -0.20821900 |
| H | -5.18581400 | -1.23681100 | 0.02166800  |
| H | -3.03470200 | -2.37845000 | 0.44441300  |
| H | -3.12062100 | 2.50838700  | -0.39816200 |
| H | -5.24242800 | 1.20996700  | -0.38908200 |
| C | -0.60679600 | 1.40641000  | -0.00830800 |
| C | -0.52939900 | -1.27736600 | 0.58005700  |
| H | -0.08803200 | -0.78727000 | 1.45535300  |
| H | -0.73473500 | -2.31154100 | 0.87169500  |
| C | 0.60705500  | 1.40687200  | 0.01036100  |
| C | 0.52895300  | -1.27733100 | -0.57911100 |
| H | 0.73422400  | -2.31155100 | -0.87077100 |
| H | 0.08764300  | -0.78727200 | -1.45438400 |
| C | 1.89808100  | 0.79456400  | -0.02105100 |
| C | 1.84954400  | -0.60143200 | -0.26977700 |
| C | 3.04940700  | -1.30785000 | -0.25782000 |
| H | 3.03406900  | -2.37866100 | -0.44437400 |
| C | 3.11415500  | 1.43950400  | 0.21063000  |
| H | 3.12122700  | 2.50829800  | 0.39754900  |
| C | 4.29704900  | 0.70894300  | 0.20655800  |
| C | 4.26369900  | -0.66406200 | -0.02277500 |
| H | 5.24305700  | 1.20955700  | 0.38632500  |
| H | 5.18584300  | -1.23693700 | -0.02358200 |

Sum of electronic and zero-point Energies: -616.53449

Sum of electronic and thermal Energies: -616.52301  
 Sum of electronic and thermal Enthalpies: -616.52207  
 Sum of electronic and thermal Free Energies: -616.57174

**OABC-II**

|   |             |             |             |
|---|-------------|-------------|-------------|
| C | 4.16049700  | 0.74944000  | -0.05819200 |
| C | 2.92338300  | 1.34601900  | 0.18677500  |
| C | 1.76383800  | 0.58161700  | 0.24036700  |
| C | 1.86278600  | -0.81581600 | 0.03039200  |
| C | 4.24702000  | -0.62616700 | -0.25247400 |
| H | 5.05618300  | 1.36105800  | -0.09642700 |
| H | 2.86053500  | 2.42016900  | 0.34073100  |
| H | 5.21025400  | -1.08892000 | -0.44186100 |
| C | 0.59306000  | -1.46804900 | 0.05258000  |
| C | 0.43257900  | 1.20647500  | 0.59805600  |
| H | 0.01971200  | 0.71174300  | 1.48385600  |
| H | 0.58247100  | 2.26550700  | 0.83112400  |
| C | -0.61880600 | -1.49265400 | 0.10442300  |
| C | -1.88047600 | -0.81841400 | 0.03739500  |
| C | -1.74897300 | 0.57125500  | -0.22218700 |
| C | -2.90751700 | 1.33182900  | -0.30840600 |
| H | -2.82680700 | 2.39376000  | -0.51699600 |
| C | -4.15419400 | -0.67071900 | 0.11552400  |
| C | -4.13464500 | 0.69873600  | -0.14187400 |
| H | -5.09864500 | -1.19160100 | 0.25066400  |
| H | -5.06282300 | 1.25591300  | -0.20895800 |
| O | -0.53970300 | 1.15261400  | -0.46808700 |
| N | -3.05781200 | -1.42146700 | 0.20652800  |
| C | 3.09953900  | -1.41255100 | -0.21123800 |
| H | 3.15289200  | -2.48427500 | -0.36997700 |

Sum of electronic and zero-point Energies: -668.50911  
 Sum of electronic and thermal Energies: -668.49798  
 Sum of electronic and thermal Enthalpies: -668.49704  
 Sum of electronic and thermal Free Energies: -668.54619

**Methyl azide (MeN<sub>3</sub>)**

|   |             |             |             |
|---|-------------|-------------|-------------|
| C | -1.52363100 | -0.29528700 | -0.00004200 |
| H | -1.52083300 | -0.92852900 | 0.89378300  |
| H | -2.42873600 | 0.30906100  | -0.00203000 |
| H | -1.51869700 | -0.93171700 | -0.89155600 |
| N | -0.39622900 | 0.64897600  | -0.00028200 |
| N | 1.77205700  | -0.28392700 | -0.00030400 |
| N | 0.71132300  | 0.10965300  | 0.00059400  |

Sum of electronic and zero-point Energies: -204.01178  
 Sum of electronic and thermal Energies: -204.0075  
 Sum of electronic and thermal Enthalpies: -204.00655  
 Sum of electronic and thermal Free Energies: -204.038

**O-ABC-MeN<sub>3</sub> TS**

|   |             |             |             |
|---|-------------|-------------|-------------|
| C | -3.61247300 | -2.30374000 | -0.10696600 |
| C | -2.31112300 | -2.66129000 | 0.23429500  |
| C | -1.32080400 | -1.68996700 | 0.27201300  |
| C | -1.68883600 | -0.36321800 | -0.05713100 |
| C | -3.86944200 | -0.96637300 | -0.38723900 |
| H | -4.40888400 | -3.03830800 | -0.14841800 |
| H | -2.06326800 | -3.69284400 | 0.47225500  |
| H | -4.87549100 | -0.64242100 | -0.64437200 |
| C | 2.10892000  | -1.08453300 | -0.18304500 |
| C | 3.37749500  | -1.65267000 | -0.21390600 |
| C | 4.50265400  | -0.84522700 | -0.07488600 |
| C | 4.36321900  | 0.52976300  | 0.10684900  |
| C | 3.09755700  | 1.10251300  | 0.13457200  |
| C | 1.95394300  | 0.31005900  | -0.01233000 |
| H | 3.45959100  | -2.72474400 | -0.35863600 |



|   |             |             |             |
|---|-------------|-------------|-------------|
| H | 5.49110100  | -1.29308600 | -0.10569000 |
| H | 5.24192200  | 1.15651300  | 0.21803000  |
| H | 2.97328100  | 2.17217000  | 0.26045200  |
| C | -0.61300800 | 0.59587300  | -0.06208900 |
| C | 0.08750100  | -2.01736200 | 0.69547200  |
| H | 0.39003700  | -1.36094300 | 1.51861200  |
| H | 0.13003900  | -3.05436100 | 1.04728500  |
| C | 0.60743400  | 0.80663200  | -0.02116500 |
| N | -1.54259900 | 2.56547900  | -0.29744800 |
| N | -0.46190200 | 3.16750200  | -0.16353600 |
| N | 0.68329800  | 3.10856300  | -0.12471300 |
| C | -2.65956400 | 2.99663000  | 0.54822900  |
| H | -3.43837900 | 2.25392400  | 0.39212800  |
| H | -2.37926100 | 3.02780200  | 1.60646400  |
| H | -3.02128200 | 3.98002100  | 0.23486800  |
| O | 1.02423300  | -1.89377000 | -0.38447200 |
| N | -2.94081200 | -0.00955600 | -0.36476700 |

Sum of electronic and zero-point Energies: -872.5095  
Sum of electronic and thermal Energies: -872.4937  
Sum of electronic and thermal Enthalpies: -872.49276  
Sum of electronic and thermal Free Energies: -872.55305  
Imaginary Frequency: -354.65

**ABC-MeN<sub>3</sub> TS**

|   |             |             |             |
|---|-------------|-------------|-------------|
| C | -3.76390800 | -2.15729400 | -0.01148700 |
| C | -2.47686300 | -2.60109600 | 0.27185200  |
| C | -1.41840000 | -1.69939400 | 0.28782800  |
| C | -1.71656500 | -0.34555200 | -0.00571800 |
| C | -3.94582800 | -0.80220000 | -0.26593900 |
| H | -4.60666700 | -2.83969500 | -0.02792300 |
| H | -2.28866300 | -3.65016600 | 0.48683400  |
| H | -4.93702800 | -0.40980500 | -0.48253100 |
| C | 2.17881500  | -1.11314100 | -0.27678200 |
| C | 3.46972400  | -1.63436000 | -0.24137800 |
| C | 4.56546600  | -0.82324200 | 0.04452300  |
| C | 4.37777400  | 0.53249900  | 0.29887600  |
| C | 3.09864700  | 1.07529000  | 0.26617100  |
| C | 1.99302800  | 0.26531100  | -0.01448100 |
| H | 3.61737400  | -2.69211300 | -0.44425700 |
| H | 5.56363100  | -1.24992100 | 0.06481200  |
| H | 5.22823600  | 1.16952600  | 0.52050200  |
| H | 2.94116500  | 2.13007600  | 0.45788700  |
| C | -0.59291200 | 0.56453600  | -0.03997100 |
| C | -0.01059200 | -2.12624200 | 0.60771500  |
| H | 0.35675100  | -1.52547800 | 1.44696900  |
| H | -0.02608600 | -3.16627800 | 0.94722900  |
| C | 0.63552700  | 0.75153600  | -0.02865700 |
| C | 0.98712900  | -1.98204000 | -0.58783600 |
| H | 0.45215800  | -1.55751800 | -1.44481200 |
| H | 1.33542500  | -2.97329500 | -0.89199900 |
| N | -1.46720700 | 2.54597200  | -0.32508000 |
| N | -0.36592800 | 3.12357000  | -0.25011800 |
| N | 0.77672600  | 2.99622900  | -0.23654700 |
| C | -2.55540200 | 3.07882400  | 0.50014200  |
| H | -2.26720200 | 3.14928300  | 1.55443400  |
| H | -2.86391800 | 4.06362800  | 0.13797400  |
| H | -3.37382800 | 2.37314300  | 0.38611500  |
| N | -2.95576000 | 0.08823000  | -0.26545200 |

Sum of electronic and zero-point Energies: -836.58372  
Sum of electronic and thermal Energies: -836.56777  
Sum of electronic and thermal Enthalpies: -836.56683  
Sum of electronic and thermal Free Energies: -836.62737  
Imaginary Frequency: -385.37

**ODIBO-MeN<sub>3</sub> TS**

|   |             |             |             |
|---|-------------|-------------|-------------|
| C | -3.70357700 | -2.21871000 | -0.11155500 |
| C | -2.42782100 | -2.51708800 | 0.36508100  |
| C | -1.41193600 | -1.56852800 | 0.32817500  |
| C | -1.68712500 | -0.28652400 | -0.19923000 |
| C | -2.96277900 | 0.00346300  | -0.69029400 |
| C | -3.96593200 | -0.95999600 | -0.64486300 |
| H | -4.48539300 | -2.97064400 | -0.07608500 |
| H | -2.21586900 | -3.50467900 | 0.76693800  |
| H | -3.14617600 | 0.98054000  | -1.12708900 |
| H | -4.95275000 | -0.72862900 | -1.03374400 |
| C | 2.05143800  | -1.15350600 | -0.11358300 |
| C | 3.29075000  | -1.78233300 | -0.06112700 |
| C | 4.45677000  | -1.02285300 | -0.03095200 |
| C | 4.38822300  | 0.36898000  | -0.03958400 |
| C | 3.15257200  | 1.00331000  | -0.08824400 |
| C | 1.96940100  | 0.25858500  | -0.13059300 |
| H | 3.31732200  | -2.86695500 | -0.05991800 |
| H | 5.42083000  | -1.52093100 | 0.00181700  |
| H | 5.29775100  | 0.96015800  | -0.01333400 |
| H | 3.08494300  | 2.08541900  | -0.10193800 |
| C | -0.57620600 | 0.62586700  | -0.22605900 |
| C | -0.03051300 | -1.88323200 | 0.84457000  |
| H | 0.28045300  | -1.13542800 | 1.58215600  |
| H | -0.03026900 | -2.86694000 | 1.32666900  |
| C | 0.64781500  | 0.81825600  | -0.19112600 |
| N | -1.46943500 | 2.64755100  | -0.16807100 |
| N | -0.35144600 | 3.20399000  | -0.10255300 |
| N | 0.78752800  | 3.09202500  | -0.17551200 |
| C | -2.35828100 | 2.90575600  | 0.97209300  |
| H | -1.82518900 | 2.84721700  | 1.92637500  |
| H | -2.84139100 | 3.88213600  | 0.87635500  |
| H | -3.12295000 | 2.12954000  | 0.94108200  |
| O | 0.93192000  | -1.93055700 | -0.22282400 |

Sum of electronic and zero-point Energies: -856.45562  
Sum of electronic and thermal Energies: -856.43976  
Sum of electronic and thermal Enthalpies: -856.43882  
Sum of electronic and thermal Free Energies: -856.49879  
Imaginary Frequency: -386.19

**DIBO-MeN<sub>3</sub> TS**

|   |             |             |             |
|---|-------------|-------------|-------------|
| C | -3.85583600 | -2.05235200 | -0.06397300 |
| C | -2.60082000 | -2.43020600 | 0.40832800  |
| C | -1.51801800 | -1.55514700 | 0.36171700  |
| C | -1.71583100 | -0.25963600 | -0.17194200 |
| C | -2.97378400 | 0.10769200  | -0.66269700 |
| C | -4.03926300 | -0.78376000 | -0.60772500 |
| H | -4.68548800 | -2.75079900 | -0.01500000 |
| H | -2.45495800 | -3.42589100 | 0.81962100  |
| H | -3.09396700 | 1.09089400  | -1.10722800 |
| H | -5.00984200 | -0.48999600 | -0.99509200 |
| C | 2.12038200  | -1.20411100 | -0.17486000 |
| C | 3.38417900  | -1.77804200 | -0.05814900 |
| C | 4.52703900  | -0.99123300 | 0.06347500  |
| C | 4.41480200  | 0.39578900  | 0.06905400  |
| C | 3.16364100  | 0.99184200  | -0.03821200 |
| C | 2.01064200  | 0.20814400  | -0.15562800 |
| H | 3.47299400  | -2.86145000 | -0.07148300 |
| H | 5.50177000  | -1.46190600 | 0.14812500  |
| H | 5.30119800  | 1.01582300  | 0.15938500  |
| H | 3.06790000  | 2.07088600  | -0.02881700 |
| C | -0.55519300 | 0.59475000  | -0.22269400 |
| C | -0.14331600 | -1.96617200 | 0.82467700  |
| H | 0.22160300  | -1.24313400 | 1.56235500  |
| H | -0.20888100 | -2.93308000 | 1.33200900  |
| C | 0.67725100  | 0.75854100  | -0.22016100 |
| C | 0.88991600  | -2.05956200 | -0.34731700 |

|   |             |             |             |
|---|-------------|-------------|-------------|
| H | 0.38920900  | -1.76561800 | -1.27676400 |
| H | 1.19878400  | -3.10129100 | -0.47455800 |
| N | -1.39142100 | 2.62367700  | -0.16140000 |
| N | -0.26187900 | 3.16364600  | -0.13846400 |
| N | 0.86931000  | 2.99573900  | -0.24879700 |
| C | -2.24828600 | 2.92651800  | 0.99175500  |
| H | -1.69589300 | 2.87445500  | 1.93534900  |
| H | -2.70954200 | 3.91242100  | 0.88567300  |
| H | -3.03198000 | 2.16893300  | 0.99315800  |

Sum of electronic and zero-point Energies: -820.5291  
Sum of electronic and thermal Energies: -820.51311  
Sum of electronic and thermal Enthalpies: -820.51217  
Sum of electronic and thermal Free Energies: -820.57221  
Imaginary Frequency: -415.57

**O-ABC-II-MeN<sub>3</sub> TS**

|   |             |             |             |
|---|-------------|-------------|-------------|
| C | -4.50827500 | -0.86432100 | -0.11506800 |
| C | -3.39600700 | -1.64388400 | 0.19847800  |
| C | -2.12647100 | -1.08003000 | 0.25515700  |
| C | -1.97081300 | 0.29908400  | -0.01212100 |
| C | -3.08952200 | 1.07735600  | -0.31815900 |
| C | -4.35168600 | 0.49471100  | -0.37224200 |
| H | -5.49337000 | -1.31813100 | -0.15694800 |
| H | -3.51575700 | -2.70515200 | 0.40120300  |
| H | -2.95600400 | 2.13576900  | -0.51143900 |
| H | -5.21592400 | 1.10525700  | -0.61446300 |
| C | 1.30001100  | -1.69714200 | -0.21352200 |
| C | 2.29350700  | -2.66467800 | -0.28327000 |
| C | 3.61855600  | -2.27830200 | -0.11808500 |
| C | 3.89116400  | -0.93397500 | 0.11957400  |
| C | 1.67553500  | -0.35190400 | 0.02553000  |
| H | 2.00909400  | -3.69421800 | -0.47536900 |
| H | 4.42456400  | -3.00208700 | -0.17073800 |
| H | 4.91555200  | -0.59561100 | 0.25511400  |
| C | -0.62579300 | 0.80432800  | 0.03366100  |
| C | -0.92918000 | -1.90587400 | 0.64534900  |
| H | -0.41715900 | -1.44818300 | 1.49881500  |
| H | -1.24814400 | -2.91376800 | 0.93063100  |
| C | 0.59534500  | 0.59900600  | 0.07423900  |
| N | -0.73209400 | 3.07809000  | 0.24738000  |
| N | 0.41215600  | 3.16297500  | 0.28266800  |
| N | 1.50702200  | 2.57976900  | 0.38146400  |
| C | 2.59714500  | 3.06772200  | -0.47098700 |
| H | 2.94131500  | 4.04781000  | -0.12874500 |
| H | 3.39449200  | 2.33729300  | -0.36115400 |
| H | 2.29193100  | 3.12997600  | -1.52075300 |
| O | 0.00626100  | -2.05217600 | -0.44316800 |
| N | 2.95266400  | 0.00857500  | 0.18963000  |

Sum of electronic and zero-point Energies: -872.50843  
Sum of electronic and thermal Energies: -872.49264  
Sum of electronic and thermal Enthalpies: -872.49169  
Sum of electronic and thermal Free Energies: -872.55196  
Imaginary Frequency: -359.41

## References

- S1. (a) Farrokh, J.; Campos, C.; Hunt, D. A. *Tetrahedron Lett.* **2015**, *56*, 5245.; See also: (b) Tagawa, H.; Kubo, S.; Ishikawa, F. *Chem. Pharm. Bull.* **1981**, *29*, 3515.; (c) Iwasaki, N.; Ohashi, T.; Musoh, K.; Nishino, H.; Kado, N.; Yasuda, H. K.; Ito, Y. *J. Med. Chem.* **1995**, *38*, 496.; (d) Piwinski, J. J.; Wong, J. K.; Green, M. J.; Ganguly, A. K. *Int. Patent WO 89/10369*, **1989**.; (e) Afonso, A.; Kelly, J. M.; Rosenblum, S.; Wolin, R.; Weinstein, J. *Int. Patent WO 98/15556*, **1998**.
- S2. Muir, C. W.; Kennedy, A. R.; Redmond, J. M.; Watson, A. J. B. *Org. Biomol. Chem.* **2013**, *11*, 3337.
- S3. Dones, J. M.; Abularrage, N. S.; Khanal, N.; Gold, B.; Raines, R. T. *J. Am. Chem. Soc.* **2021**, *143*, 9489.
- S4. (a) Wardrop, D. J.; Komenda, J. P. *Org. Lett.* **2012**, *14*, 1548-1551; (b) Alexakos, P. D.; Wardrop, D. J. *J. Org. Chem.* **2019**, *84*, 12430-12436.
- S5. Groom, C.R.; Bruno, I. J.; Lightfoot, M. P.; Ward, S. C. *Acta Cryst.* **2016**, *B72*, 171.
- S6. CrysAlispro, *1.171.42.84*, **2023**, Rigaku OD.
- S7. (a) Sheldrick, G. M. *Acta Cryst.* **2015**, *A71*, 3. (b) Sheldrick, G. M. *Acta Cryst.* **2015**, *C71*, 3.
- S8. Dolomanov, O. V.; Bourhis, L. J.; Gildea, R. J.; Howard, J. A. K.; Puschmann, H. *J. Appl. Cryst.* **2009**, *42*, 339.
- S9. Frisch, M. J.; Trucks, G. W.; Schlegel, H. B.; Scuseria, G. E.; Robb, M. A.; Cheeseman, J. R.; Scalmani, G.; Barone, V.; Petersson, G. A.; Nakatsuji, H.; Li, X.; Caricato, M.; Marenich, A. V.; Bloino, J.; Janesko, B. G.; Gomperts, R.; Mennucci, B.; Hratchian, H. P.; Ortiz, J. V.; Izmaylov, A. F.; Sonnenberg, J. L.; Williams, Ding, F.; Lipparini, F.; Egidi, F.; Goings, J.; Peng, B.; Petrone, A.; Henderson, T.; Ranasinghe, D.; Zakrzewski, V. G.; Gao, J.; Rega, N.; Zheng, G.; Liang, W.; Hada, M.; Ehara, M.; Toyota, K.; Fukuda, R.; Hasegawa, J.; Ishida, M.; Nakajima, T.; Honda, Y.; Kitao, O.; Nakai, H.; Vreven, T.; Throssell, K.; Montgomery Jr., J. A.; Peralta, J. E.; Ogliaro, F.; Bearpark, M. J.; Heyd, J. J.; Brothers, E. N.; Kudin, K. N.; Staroverov, V. N.; Keith, T. A.; Kobayashi, R.; Normand, J.; Raghavachari, K.; Rendell, A. P.; Burant, J. C.; Iyengar, S. S.; Tomasi, J.; Cossi, M.; Millam, J. M.; Klene, M.; Adamo, C.; Cammi, R.; Ochterski, J. W.; Martin, R. L.; Morokuma, K.; Farkas, O.; Foresman, J. B.; Fox, D. J. *Gaussian 16 Rev. C.01*, Wallingford, CT, 2016.
- S10. Zhao, Y.; Truhlar, D. G. *Theor. Chem. Acc.* **2008**, *120*, 215.
- S11. Glendening, E. D.; Badenhoop, J. K.; Reed, A. E.; Carpenter, J. E.; Bohmann, J. A.; Morales, C. M.; Karafiloglou, P.; Landis, C. R.; Weinhold, F. NBO 7.0; Theoretical Chemistry Institute, University of Wisconsin–Madison: Madison, WI, 2018.
